# Supplementary material for: Acylated Flavonoid Glycosides are the Main Pigments that Determine the Flower Colour of the Brazilian Native Tree Tibouchina pulchra (Cham.) Cogn
Source: MDPI journal article supplement (doi:10.3390/molecules24040718), 2019-02-16
Supplement: s1 [file s1]

Article

# Acylated flavonoid glycosides are the main pigments that determine the flower colour of the Brazilian native tree *Tibouchina pulchra* (Cham.) Cogn.

Fernanda Mendes Rezende <sup>1,\*</sup>, Marcelo José Pena Ferreira <sup>1</sup>, Mads Hartvig Clausen <sup>2</sup>,  
Magdalena Rossi <sup>1</sup> and Claudia Maria Furlan <sup>1,\*</sup>

<sup>1</sup> Botany Department, Institute of Bioscience, University of São Paulo (USP), São Paulo, Brazil; marcelopena@ib.usp.br (M.J.P.F.); magdarossirosso@gmail.com (M.R.)

<sup>2</sup> Center for Nanomedicine and Theranostics, Department of Chemistry, Technical University of Denmark, Kgs. Lyngby, Denmark; mhc@kemi.dtu.dk

\* Correspondence: rezendefm@usp.br (F.M.R.); furlanm@ib.usp.br (C.M.F.); Tel.: +55-011-3091-8065

## SUPPLEMENTARY MATERIAL

|                                                                                                                                                                                                           |    |
|-----------------------------------------------------------------------------------------------------------------------------------------------------------------------------------------------------------|----|
| <b>Figure S1.</b> MS <sup>+</sup> spectra of compounds <b>1</b> to <b>30</b> . Structures represent the proposed compound and its main fragmentation.....                                                 | 1  |
| <b>Figure S2.</b> <sup>1</sup> H NMR spectrum (DMSO- <i>d</i> <sub>6</sub> ) of kaempferol 3-O-(2''-galloyl)-β-D-glucopyranoside ( <b>13</b> , <b>16</b> or <b>19</b> ).....                              | 8  |
| <b>Figure S3.</b> Zoom from 5.2 to 8.5 ppm, <sup>1</sup> H NMR spectrum (DMSO- <i>d</i> <sub>6</sub> ) of kaempferol 3-O-(2''-galloyl)-β-D-glucopyranoside ( <b>13</b> , <b>16</b> or <b>19</b> ) .....   | 8  |
| <b>Figure S4.</b> HSQC NMR spectrum (DMSO- <i>d</i> <sub>6</sub> ) of kaempferol 3-O-(2''-galloyl)-β-D-glucopyranoside ( <b>13</b> , <b>16</b> or <b>19</b> ).....                                        | 9  |
| <b>Figure S5.</b> Zoom from 2.7 to 3.8 ppm, HSQC NMR spectrum (DMSO- <i>d</i> <sub>6</sub> ) of kaempferol 3-O-(2''-galloyl)-β-D-glucopyranoside ( <b>13</b> , <b>16</b> or <b>19</b> ).....              | 9  |
| <b>Figure S6.</b> HMBC NMR spectrum (DMSO- <i>d</i> <sub>6</sub> ) of kaempferol 3-O-(2''-galloyl)-β-D-glucopyranoside ( <b>13</b> , <b>16</b> or <b>19</b> ).....                                        | 10 |
| <b>Figure S7.</b> Zoom from 2.7 to 3.9 ppm, HMBC NMR spectrum (DMSO- <i>d</i> <sub>6</sub> ) of kaempferol 3-O-(2''-galloyl)-β-D-glucopyranoside ( <b>13</b> , <b>16</b> or <b>19</b> ) .....             | 10 |
| <b>Figure S8.</b> Zoom from 5.2 to 8.6 ppm, HMBC NMR spectrum (DMSO- <i>d</i> <sub>6</sub> ) of kaempferol 3-O-(2''-galloyl)-β-D-glucopyranoside ( <b>13</b> , <b>16</b> or <b>19</b> ) .....             | 11 |
| <b>Figure S9.</b> <sup>1</sup> H NMR spectrum (DMSO- <i>d</i> <sub>6</sub> ) of kaempferol 3-O-(6''-galloyl)-β-D-glucopyranoside ( <b>13</b> , <b>16</b> or <b>19</b> ).....                              | 11 |
| <b>Figure S10.</b> Zoom from 5.1 to 8.1 ppm, <sup>1</sup> H NMR spectrum (DMSO- <i>d</i> <sub>6</sub> ) of kaempferol 3-O-(6''-galloyl)-β-D-glucopyranoside ( <b>13</b> , <b>16</b> or <b>19</b> ). ..... | 12 |
| <b>Figure S11.</b> HSQC NMR spectrum (DMSO- <i>d</i> <sub>6</sub> ) of kaempferol 3-O-(6''-galloyl)-β-D-glucopyranoside ( <b>13</b> , <b>16</b> or <b>19</b> ).....                                       | 12 |
| <b>Figure S12.</b> Zoom from 3.0 to 4.6 ppm, HSQC NMR spectrum (DMSO- <i>d</i> <sub>6</sub> ) of kaempferol 3-O-(6''-galloyl)-β-D-glucopyranoside ( <b>13</b> , <b>16</b> or <b>19</b> ).....             | 13 |
| <b>Figure S13.</b> HMBC NMR spectrum (DMSO- <i>d</i> <sub>6</sub> ) of kaempferol 3-O-(6''-galloyl)-β-D-glucopyranoside ( <b>13</b> , <b>16</b> or <b>19</b> ).....                                       | 13 |
| <b>Figure S14.</b> Zoom from 2.8 to 4.9 ppm, HMBC NMR spectrum (DMSO- <i>d</i> <sub>6</sub> ) of kaempferol 3-O-(6''-galloyl)-β-D-glucopyranoside ( <b>13</b> , <b>16</b> or <b>19</b> ).....             | 14 |

|    |                                                                                                                                                                 |    |
|----|-----------------------------------------------------------------------------------------------------------------------------------------------------------------|----|
| 41 | <b>Figure S15.</b> Zoom from 5.2 to 8.4 ppm, HMBC NMR spectrum (DMSO- <i>d</i> <sub>6</sub> ) of kaempferol                                                     |    |
| 42 | 3- <i>O</i> -(6''-galloyl)- $\beta$ -D-glucopyranoside ( <b>13</b> , <b>16</b> or <b>19</b> ).....                                                              | 14 |
| 43 | <b>Figure S16.</b> <sup>1</sup> H NMR spectrum (DMSO- <i>d</i> <sub>6</sub> ) of mixture                                                                        |    |
| 44 | ( <b>17</b> ).....                                                                                                                                              | 15 |
| 45 | <b>Figure S17.</b> Zoom from 5.2 to 8.2 ppm, <sup>1</sup> H NMR spectrum (DMSO- <i>d</i> <sub>6</sub> ) of mixture                                              |    |
| 46 | ( <b>17</b> ).....                                                                                                                                              | 15 |
| 47 | <b>Figure S18.</b> <sup>13</sup> C NMR spectrum (DMSO- <i>d</i> <sub>6</sub> ) of mixture                                                                       |    |
| 48 | ( <b>17</b> ).....                                                                                                                                              | 16 |
| 49 | <b>Figure S19.</b> HMBC NMR spectrum (DMSO- <i>d</i> <sub>6</sub> ) of mixture                                                                                  |    |
| 50 | ( <b>17</b> ).....                                                                                                                                              | 16 |
| 51 | <b>Figure S20.</b> Zoom from 2.4 to 4.5 ppm, HMBC NMR spectrum (DMSO- <i>d</i> <sub>6</sub> ) of mixture                                                        |    |
| 52 | ( <b>17</b> ).....                                                                                                                                              | 17 |
| 53 | <b>Figure S21.</b> Zoom from 4.8 to 8.6 ppm, HMBC NMR spectrum (DMSO- <i>d</i> <sub>6</sub> ) of mixture                                                        |    |
| 54 | ( <b>17</b> ).....                                                                                                                                              | 17 |
| 55 | <b>Figure S22.</b> <sup>1</sup> H NMR spectrum (DMSO- <i>d</i> <sub>6</sub> ) of kaempferol 3- <i>O</i> -glucuronide-6''- <i>O</i> -methylester                 |    |
| 56 | ( <b>23</b> ).....                                                                                                                                              | 18 |
| 57 | <b>Figure S23.</b> Zoom from 5.1 to 8.1 ppm, <sup>1</sup> H NMR spectrum (DMSO- <i>d</i> <sub>6</sub> ) of kaempferol                                           |    |
| 58 | 3- <i>O</i> -glucuronide-6''- <i>O</i> -methylester ( <b>23</b> ).....                                                                                          | 18 |
| 59 | <b>Figure S24.</b> HSQC NMR spectrum (DMSO- <i>d</i> <sub>6</sub> ) of kaempferol 3- <i>O</i> -glucuronide-6''- <i>O</i> -methylester                           |    |
| 60 | ( <b>23</b> ).....                                                                                                                                              | 19 |
| 61 | <b>Figure S25.</b> Zoom from 2.9 to 4.5 ppm, HSQC NMR spectrum (DMSO- <i>d</i> <sub>6</sub> ) of kaempferol                                                     |    |
| 62 | 3- <i>O</i> -glucuronide-6''- <i>O</i> -methylester ( <b>23</b> ).....                                                                                          | 19 |
| 63 | <b>Figure S26.</b> Zoom from 5.0 to 8.6 ppm, HMBC NMR spectrum (DMSO- <i>d</i> <sub>6</sub> ) of kaempferol                                                     |    |
| 64 | 3- <i>O</i> -glucuronide-6''- <i>O</i> -methylester ( <b>23</b> ).....                                                                                          | 20 |
| 65 | <b>Figure S27.</b> <sup>1</sup> H NMR spectrum (DMSO- <i>d</i> <sub>6</sub> ) of quercetin 3- <i>O</i> -(6''- <i>p</i> -coumaroyl)- $\beta$ -D-glucopyranoside  |    |
| 66 | ( <b>25</b> ).....                                                                                                                                              | 20 |
| 67 | <b>Figure S28.</b> Zoom from 5.1 to 8.1 ppm, <sup>1</sup> H NMR spectrum (DMSO- <i>d</i> <sub>6</sub> ) of quercetin                                            |    |
| 68 | 3- <i>O</i> -(6''- <i>p</i> -coumaroyl)- $\beta$ -D-glucopyranoside ( <b>25</b> ).....                                                                          | 21 |
| 69 | <b>Figure S29.</b> HSQC NMR spectrum (DMSO- <i>d</i> <sub>6</sub> ) of quercetin 3- <i>O</i> -(6''- <i>p</i> -coumaroyl)- $\beta$ -D-glucopyranoside            |    |
| 70 | ( <b>25</b> ).....                                                                                                                                              | 21 |
| 71 | <b>Figure S30.</b> Zoom from 2.7 to 4.7 ppm, HSQC NMR spectrum (DMSO- <i>d</i> <sub>6</sub> ) of quercetin                                                      |    |
| 72 | 3- <i>O</i> -(6''- <i>p</i> -coumaroyl)- $\beta$ -D-glucopyranoside ( <b>25</b> ).....                                                                          | 22 |
| 73 | <b>Figure S31.</b> Zoom from 5.0 to 8.8 ppm, HSQC NMR spectrum (DMSO- <i>d</i> <sub>6</sub> ) of quercetin                                                      |    |
| 74 | 3- <i>O</i> -(6''- <i>p</i> -coumaroyl)- $\beta$ -D-glucopyranoside ( <b>25</b> ).....                                                                          | 22 |
| 75 | <b>Figure S32.</b> <sup>1</sup> H NMR spectrum (DMSO- <i>d</i> <sub>6</sub> ) of kaempferol 3- <i>O</i> -(6''- <i>p</i> -coumaroyl)- $\beta$ -D-glucopyranoside |    |
| 76 | ( <b>27</b> ).....                                                                                                                                              | 23 |
| 77 | <b>Figure S33.</b> Zoom from 5.1 to 8.1 ppm, <sup>1</sup> H NMR spectrum (DMSO- <i>d</i> <sub>6</sub> ) of kaempferol                                           |    |
| 78 | 3- <i>O</i> -(6''- <i>p</i> -coumaroyl)- $\beta$ -D-glucopyranoside ( <b>27</b> ).....                                                                          | 23 |
| 79 | <b>Figure S34.</b> HSQC NMR spectrum (DMSO- <i>d</i> <sub>6</sub> ) of kaempferol 3- <i>O</i> -(6''- <i>p</i> -coumaroyl)- $\beta$ -D-glucopyranoside           |    |
| 80 | ( <b>27</b> ).....                                                                                                                                              | 24 |
| 81 | <b>Figure S35.</b> Zoom from 3.0 to 4.6 ppm, HSQC NMR spectrum (DMSO- <i>d</i> <sub>6</sub> ) of kaempferol                                                     |    |
| 82 | 3- <i>O</i> -(6''- <i>p</i> -coumaroyl)- $\beta$ -D-glucopyranoside ( <b>27</b> ).....                                                                          | 24 |

|     |                                                                                                                                                                     |    |
|-----|---------------------------------------------------------------------------------------------------------------------------------------------------------------------|----|
| 83  | <b>Figure S36.</b> HMBC NMR spectrum (DMSO- <i>d</i> <sub>6</sub> ) of kaempferol 3- <i>O</i> -(6''- <i>p</i> -coumaroyl)-β-D-glucopyranoside                       |    |
| 84  | (27).....                                                                                                                                                           | 25 |
| 85  | <b>Figure S37.</b> Zoom from 2.9 to 4.8 ppm, HMBC NMR spectrum (DMSO- <i>d</i> <sub>6</sub> ) of kaempferol                                                         |    |
| 86  | 3- <i>O</i> -(6''- <i>p</i> -coumaroyl)-β-D-glucopyranoside (27).....                                                                                               | 25 |
| 87  | <b>Figure S38.</b> Zoom from 5.2 to 8.4 ppm, HMBC NMR spectrum (DMSO- <i>d</i> <sub>6</sub> ) of kaempferol                                                         |    |
| 88  | 3- <i>O</i> -(6''- <i>p</i> -coumaroyl)-β-D-glucopyranoside (27).....                                                                                               | 26 |
| 89  | <b>Figure S39.</b> <sup>1</sup> H NMR spectrum (DMSO- <i>d</i> <sub>6</sub> ) of kaempferol                                                                         |    |
| 90  | (29).....                                                                                                                                                           | 26 |
| 91  | <b>Figure S40.</b> Zoom from 6.1 to 8.2 ppm, <sup>1</sup> H NMR spectrum (DMSO- <i>d</i> <sub>6</sub> ) of kaempferol                                               |    |
| 92  | (29).....                                                                                                                                                           | 27 |
| 93  | <b>Figure S41.</b> <sup>13</sup> C NMR spectrum (DMSO- <i>d</i> <sub>6</sub> ) of kaempferol                                                                        |    |
| 94  | (29).....                                                                                                                                                           | 27 |
| 95  | <b>Table S1.</b> NMR data of <sup>1</sup> H, <sup>13</sup> C and HMBC for kaempferol 3- <i>O</i> -(6''- <i>O</i> -galloyl)-β-D-glucopyranoside and                  |    |
| 96  | Kaempferol 3- <i>O</i> -(2''- <i>O</i> -galloyl)-β-D-glucopyranoside (13, 16 or 19).....                                                                            | 28 |
| 97  | <b>Table S2.</b> NMR data of <sup>1</sup> H, <sup>13</sup> C and HMBC for kaempferol 3- <i>O</i> -glucuronide-6''- <i>O</i> -methylester (23).....                  | 29 |
| 98  | <b>Table S3.</b> NMR data of <sup>1</sup> H, <sup>13</sup> C and HMBC for quercetin 3- <i>O</i> -(6''- <i>O</i> - <i>p</i> -coumaroyl)-β-D-glucopyranoside (25) and |    |
| 99  | Kaempferol 3- <i>O</i> -(6''- <i>O</i> - <i>p</i> -coumaroyl)-β-D-glucopyranoside (27).....                                                                         | 30 |
| 100 | <b>Table S4.</b> NMR data of <sup>1</sup> H and <sup>13</sup> C for kaempferol (29).....                                                                            | 31 |
| 101 |                                                                                                                                                                     |    |

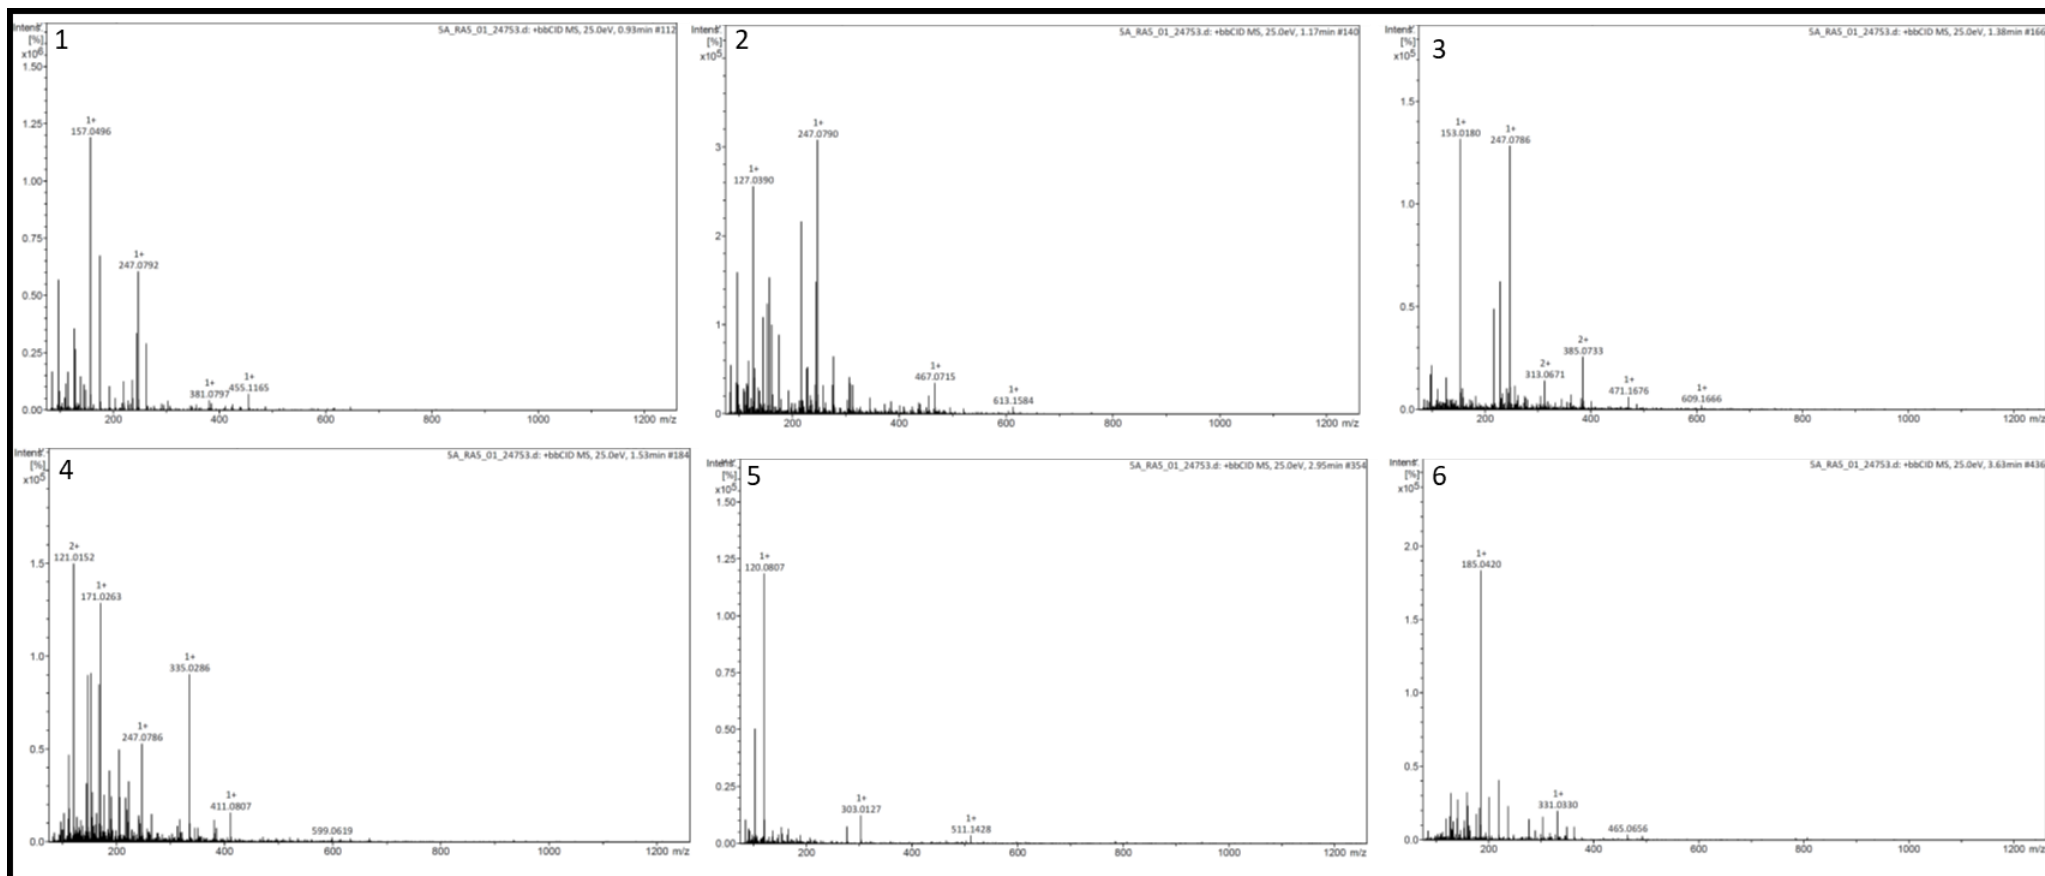

**Figure S1.** MS<sup>+</sup> spectra of compounds 1 to 30. Structures represent the proposed compound and its main fragmentation.

105 Figure S1 (continue).

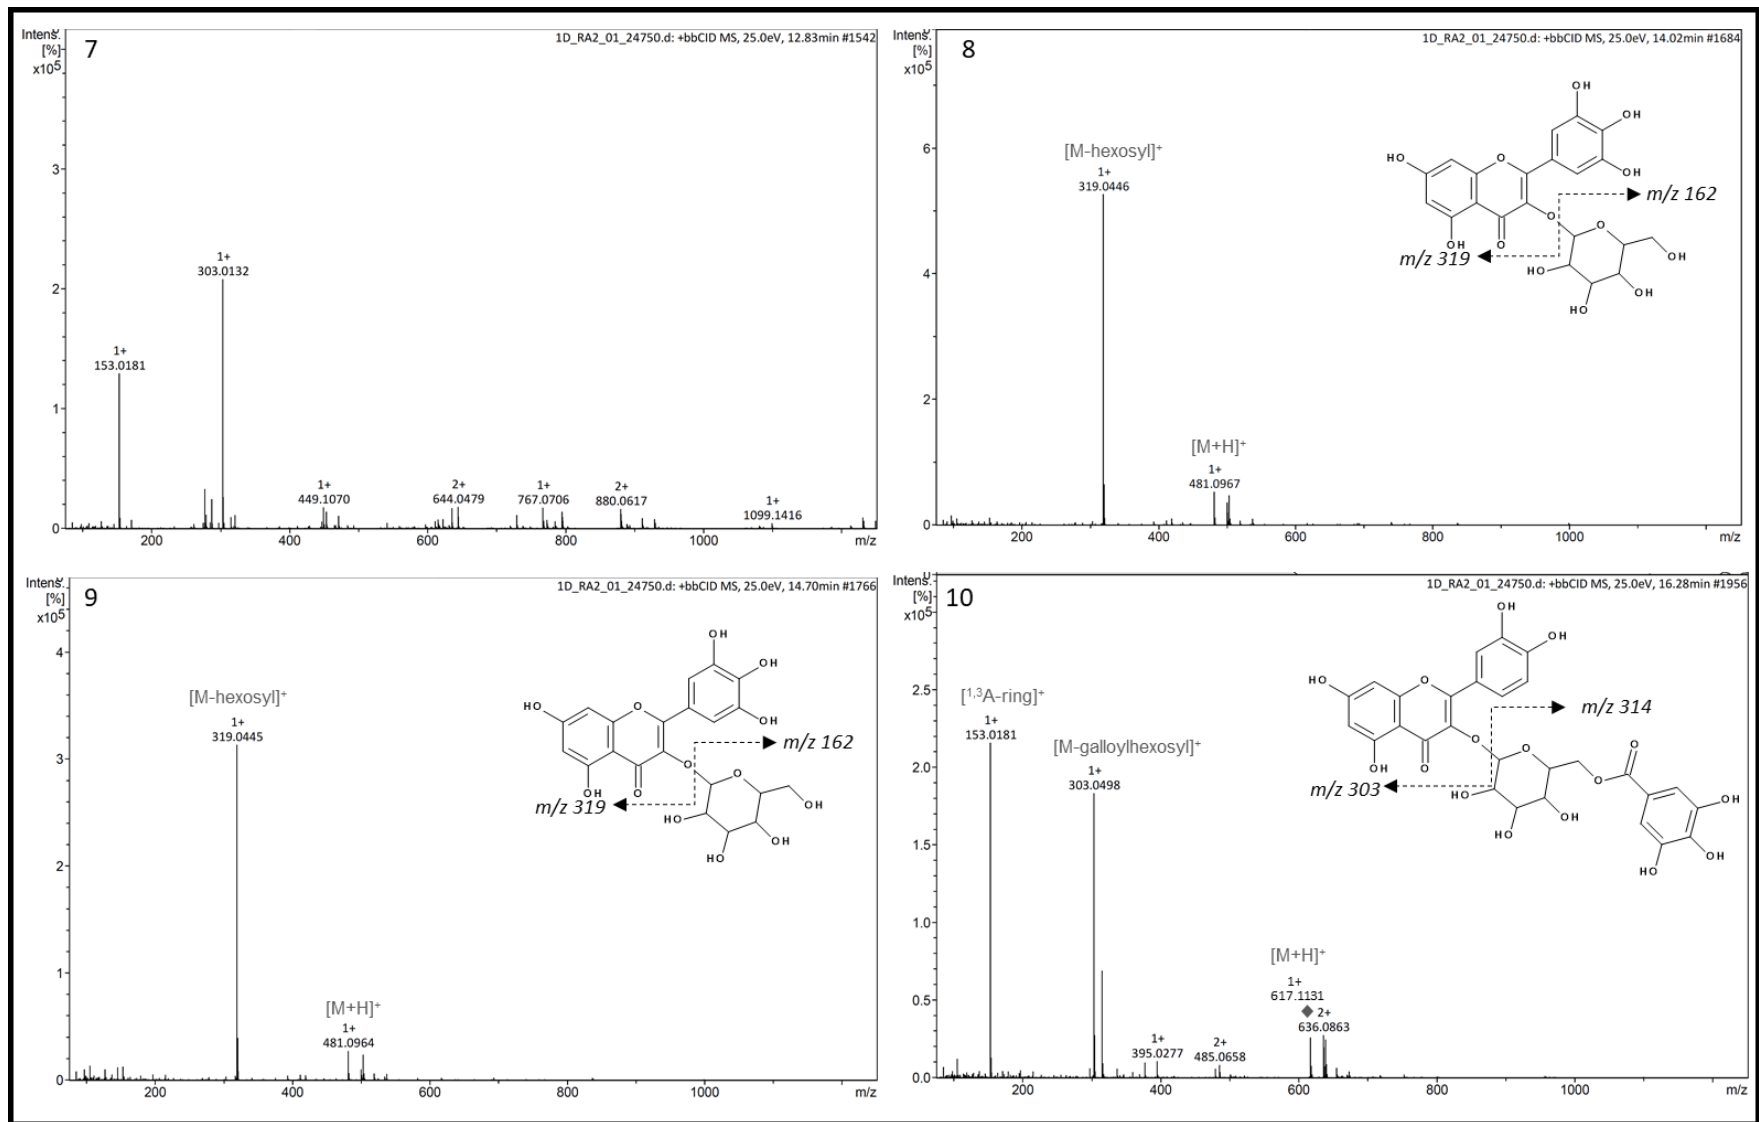

107 Figure S1 (continue).

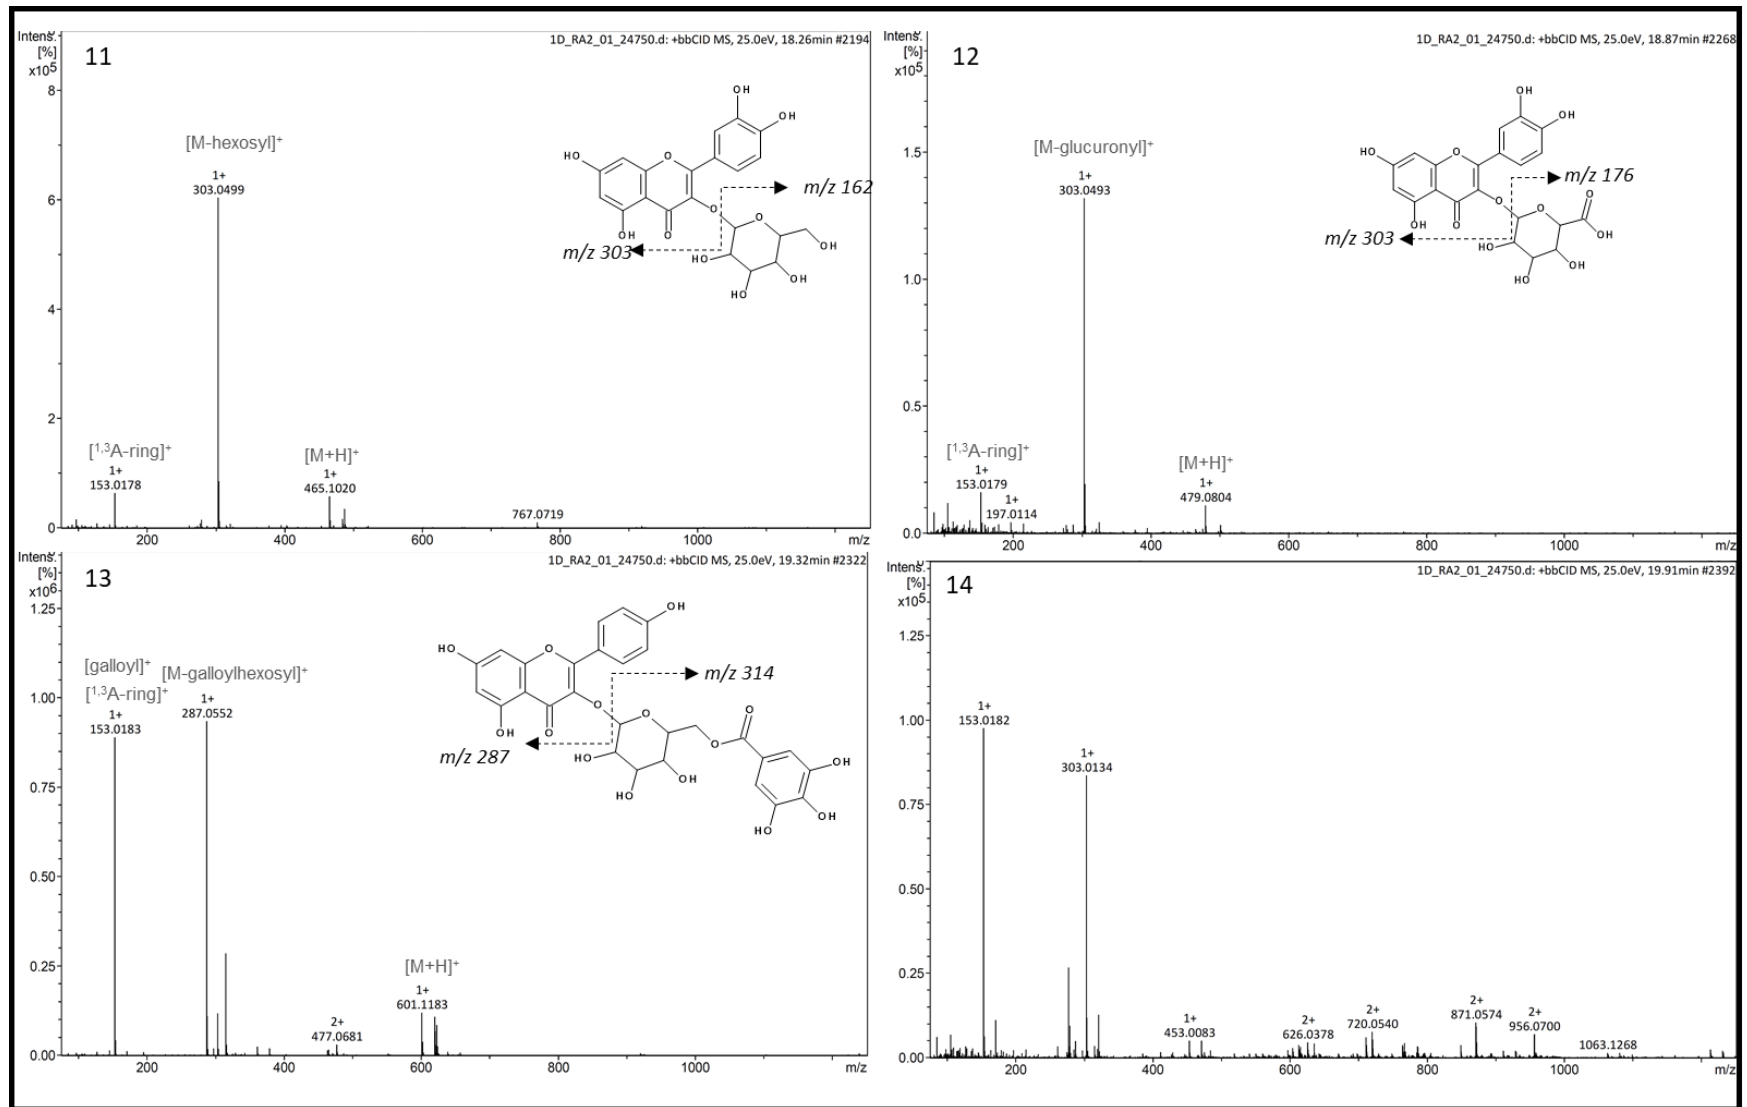

109 Figure S1 (continue).

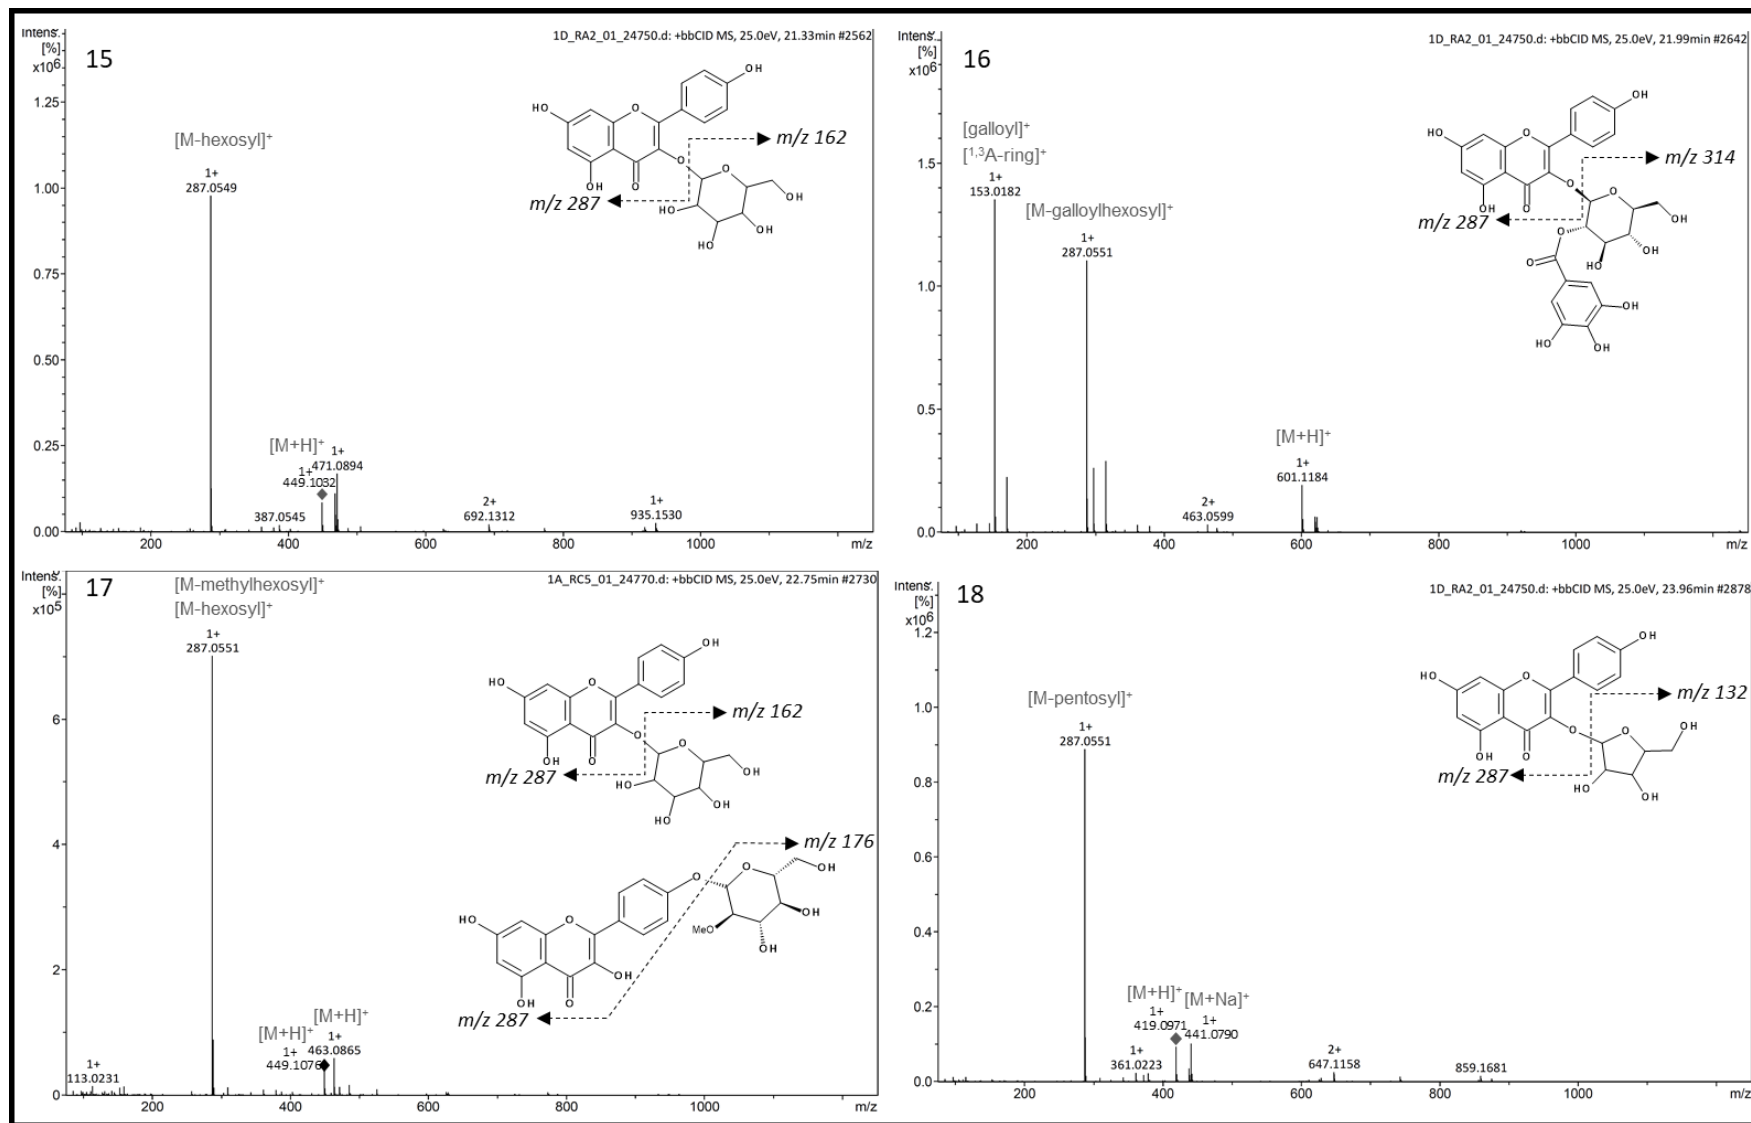

111 Figure S1 (continue).

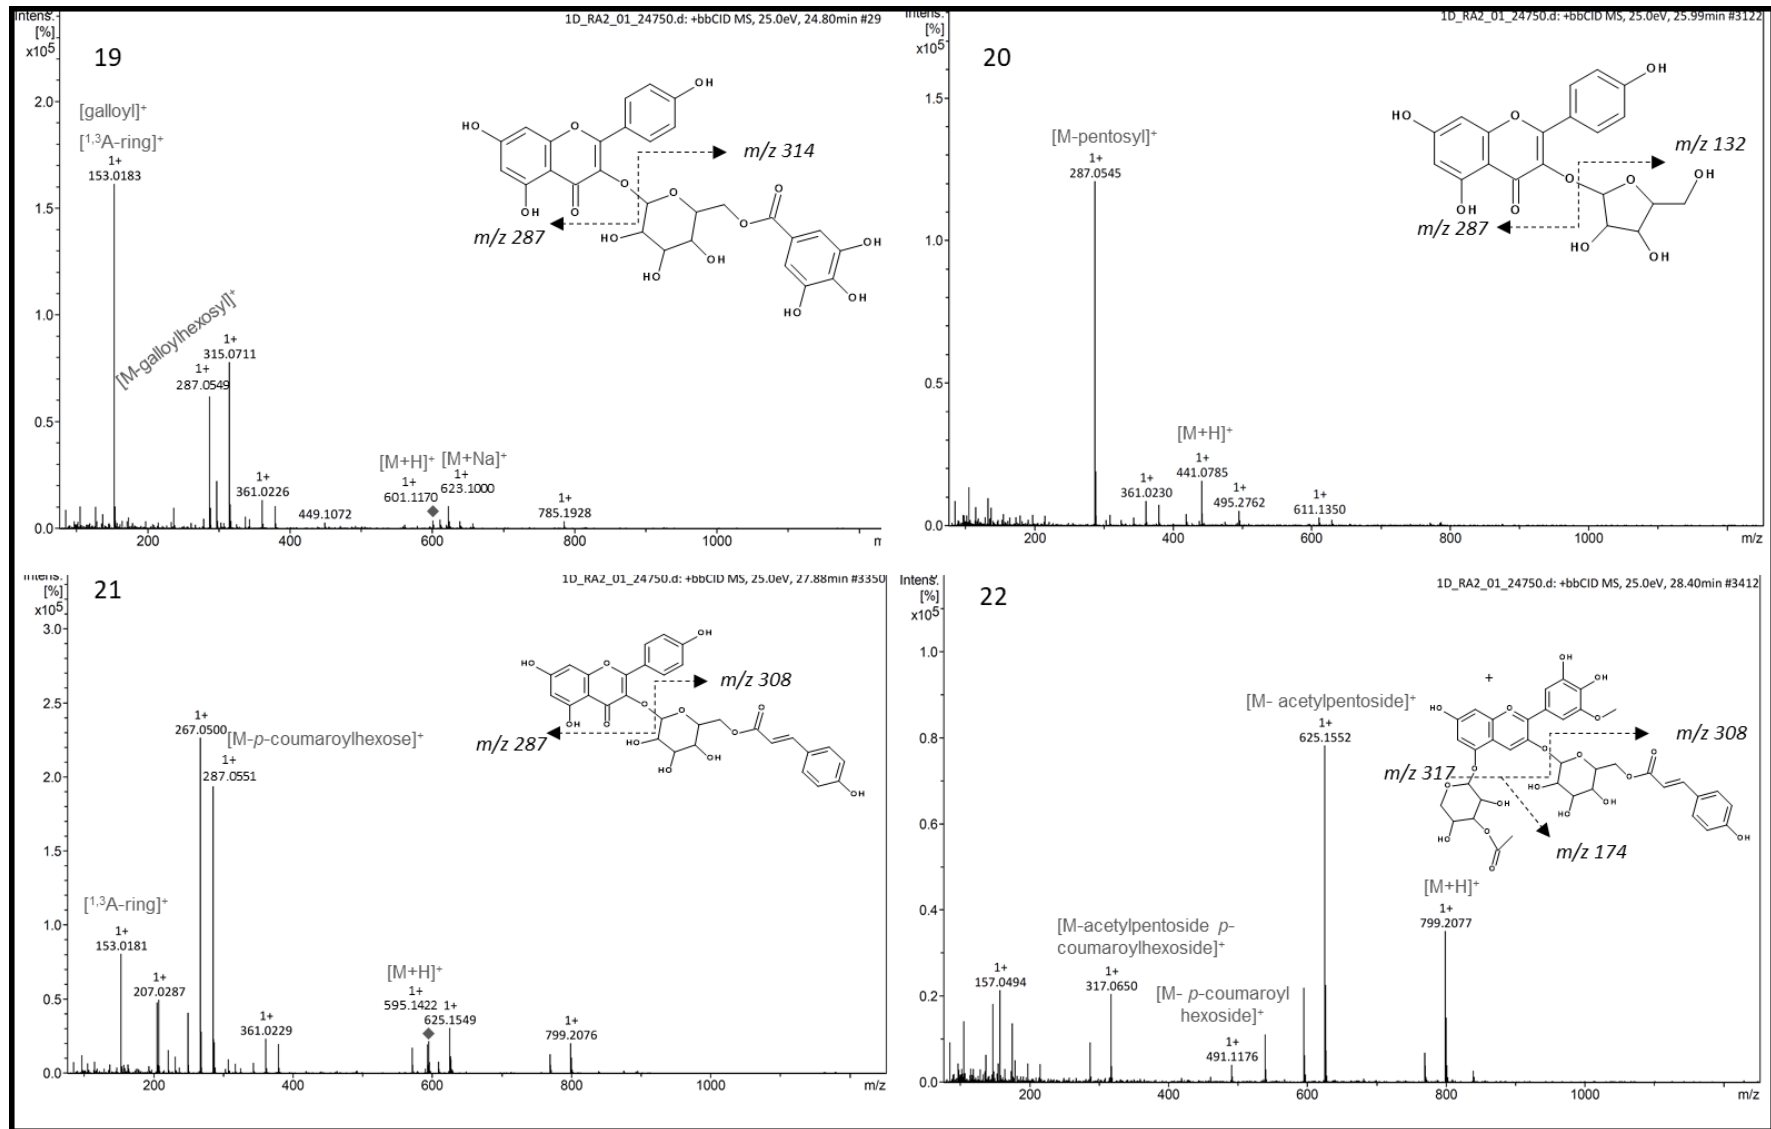



113 Figure S1 (continue).

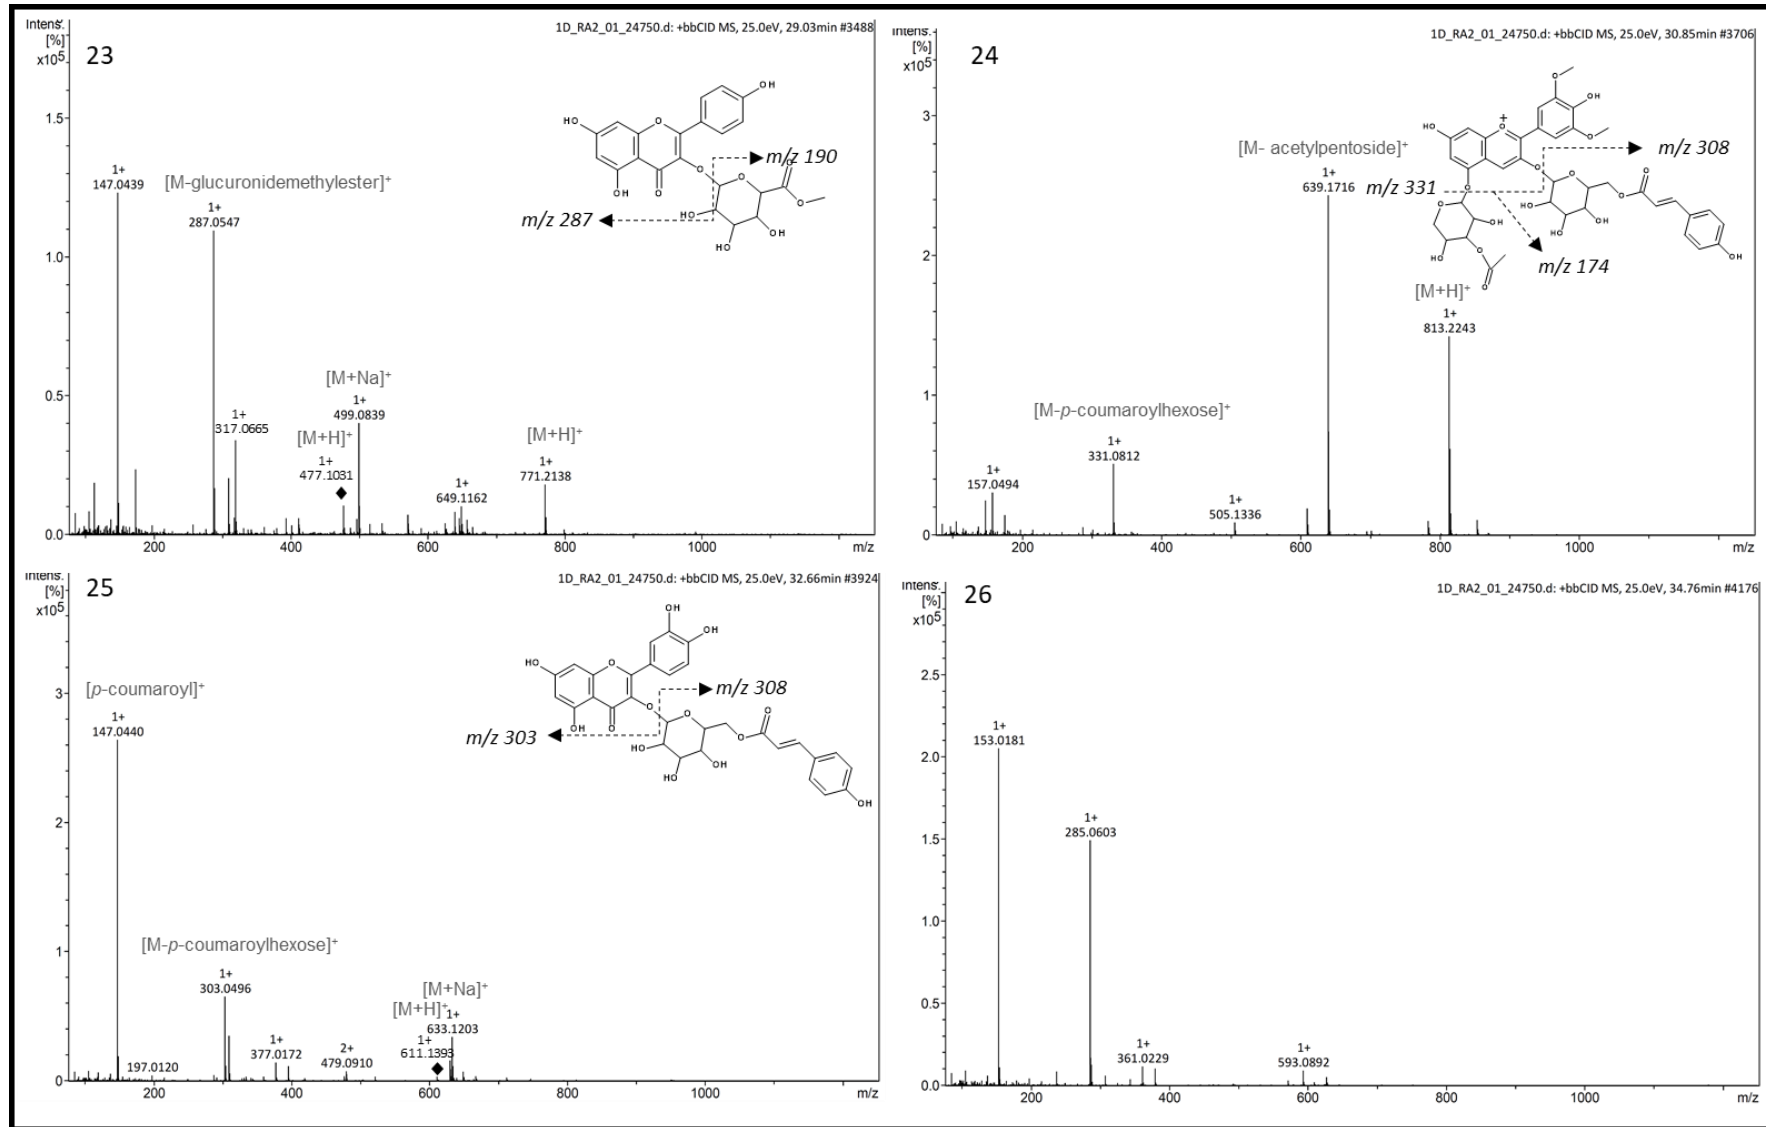

115 Figure S1 (continue).

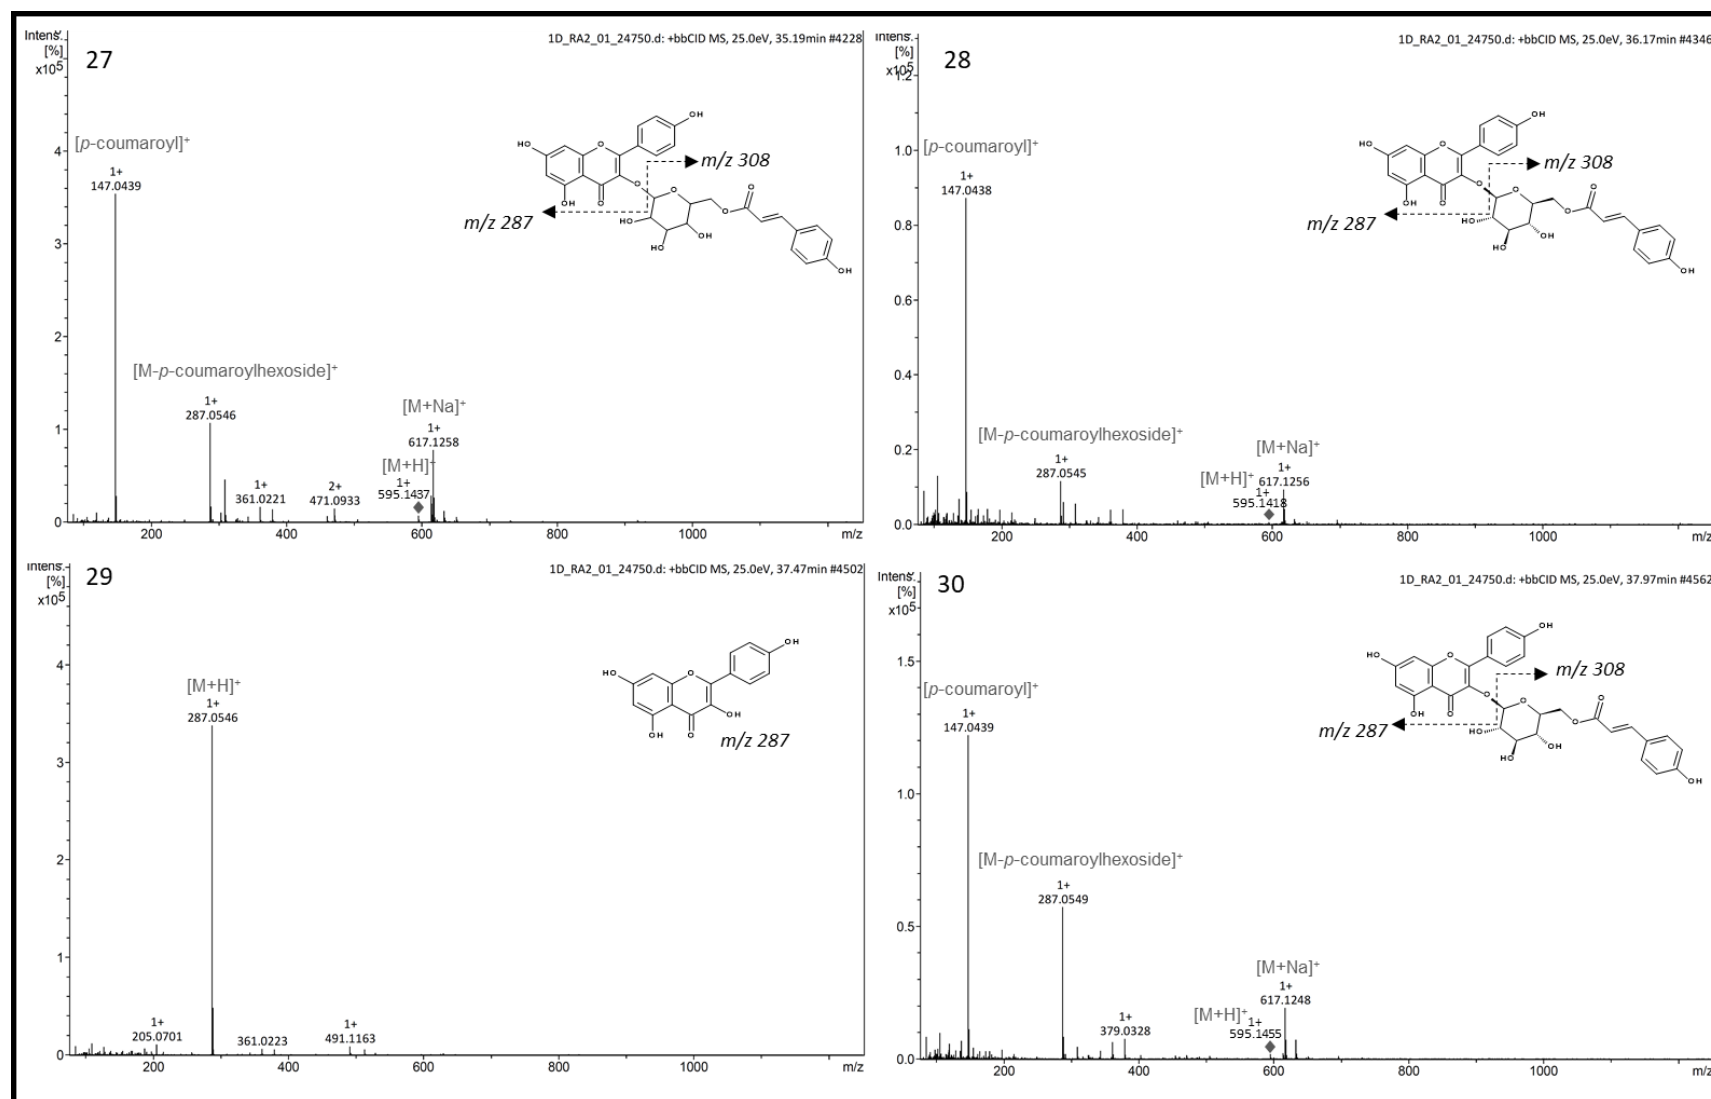

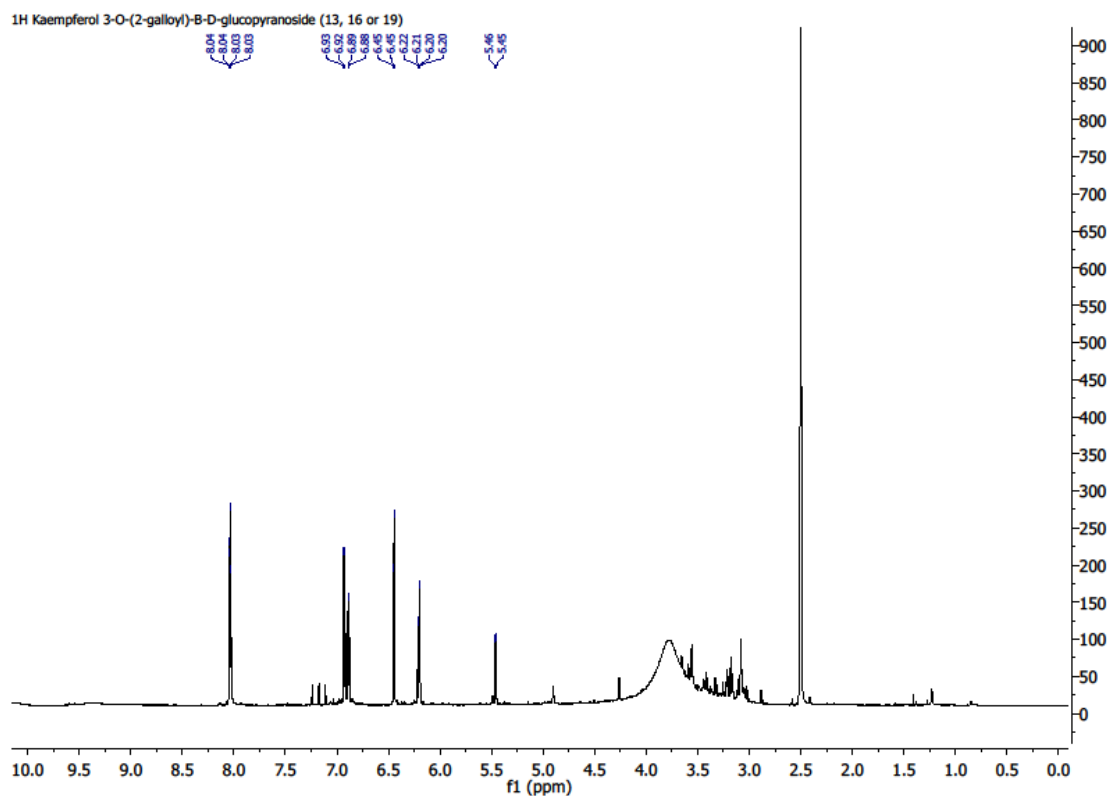

Figure S2.  $^1\text{H}$  NMR spectrum (DMSO- $d_6$ ) of kaempferol 3-O-(2''-galloyl)- $\beta$ -D-glucopyranoside (13, 16 or 19).

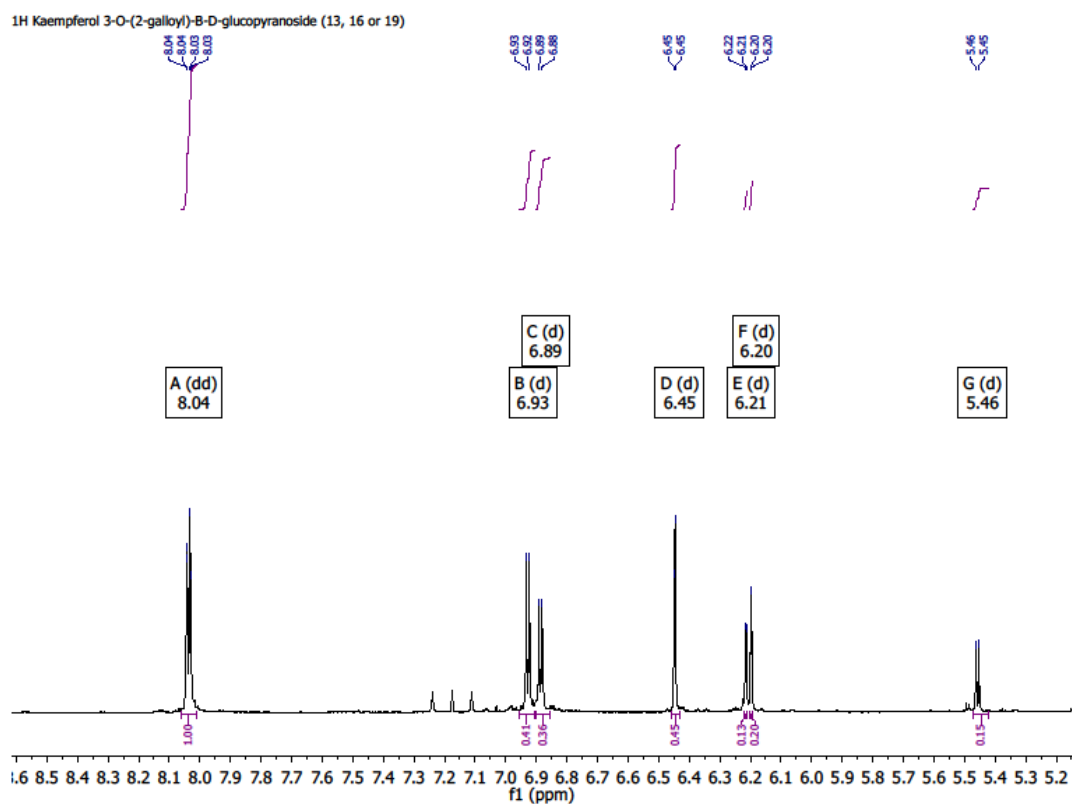

Figure S3. Zoom from 5.2 to 8.5 ppm,  $^1\text{H}$  NMR spectrum (DMSO- $d_6$ ) of kaempferol 3-O-(2''-galloyl)- $\beta$ -D-glucopyranoside (13, 16 or 19).

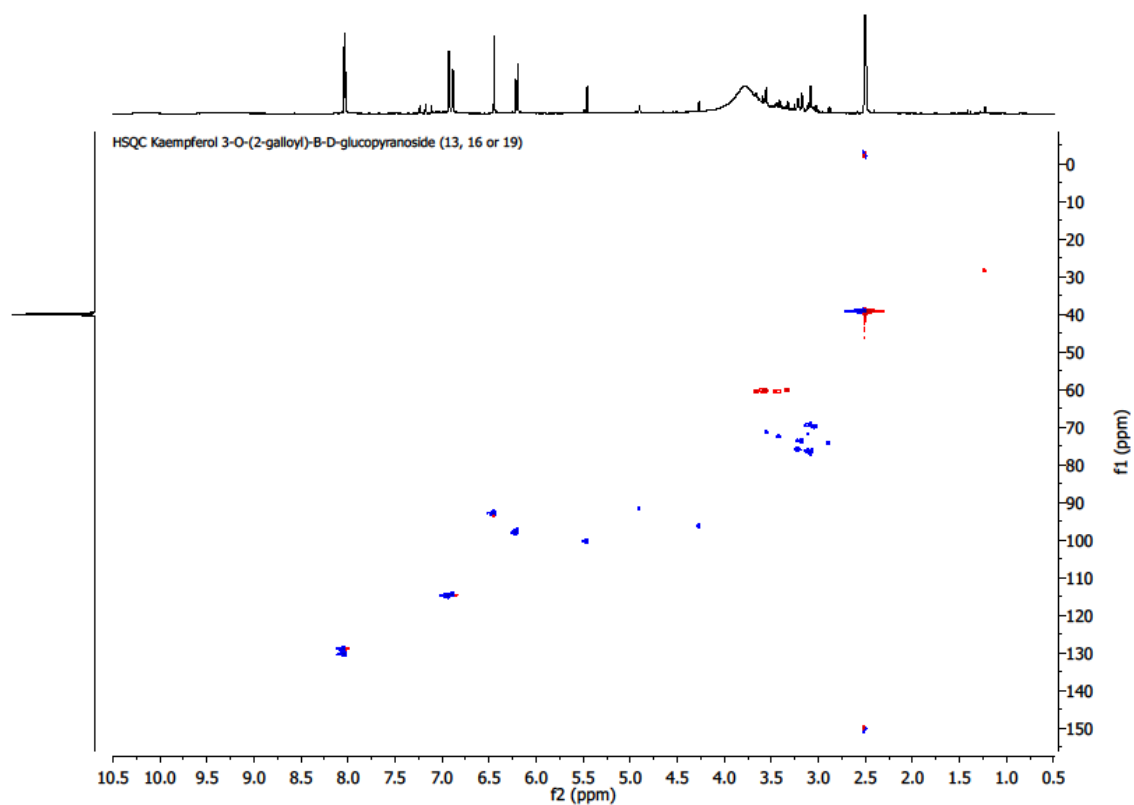

**Figure S4.** HSQC NMR spectrum (DMSO-*d*<sub>6</sub>) of kaempferol 3-*O*-(2''-galloyl)-β-D-glucopyranoside (13, 16 or 19).

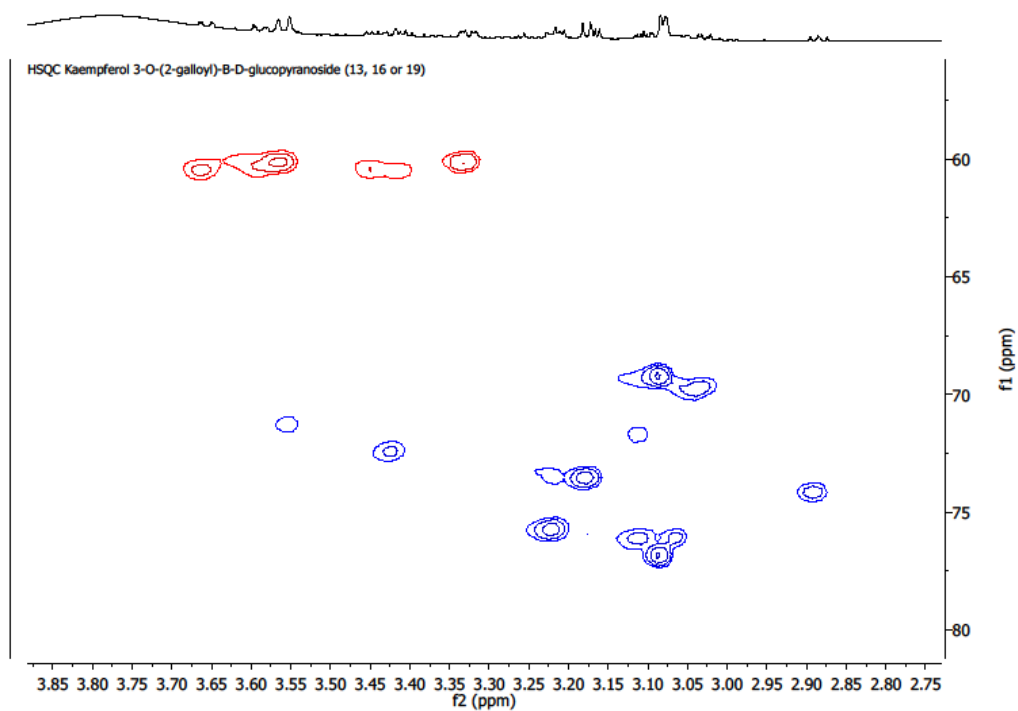

**Figure S5.** Zoom from 2.7 to 3.8 ppm, HSQC NMR spectrum (DMSO-*d*<sub>6</sub>) of kaempferol 3-*O*-(2''-galloyl)-β-D-glucopyranoside (13, 16 or 19).

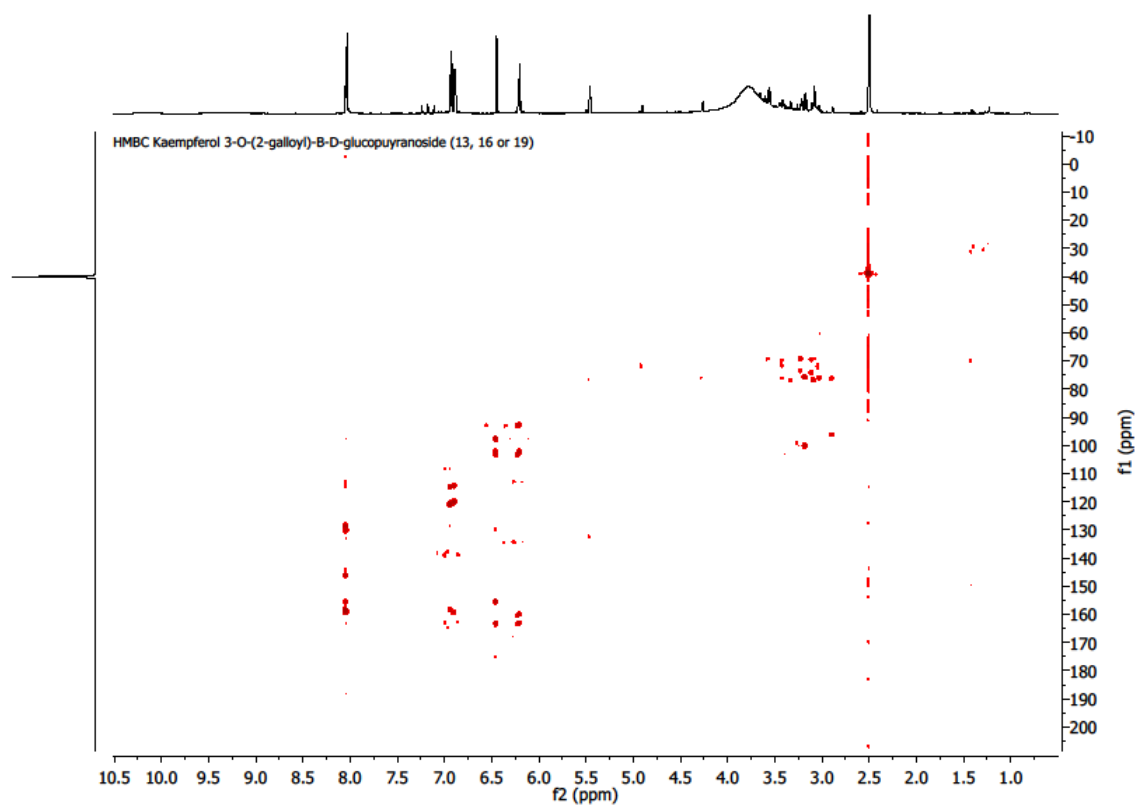

130

131 **Figure S6.** HMBC NMR spectrum (DMSO-*d*<sub>6</sub>) of kaempferol 3-*O*-(2''-galloyl)-β-D-glucopyranoside (13, 16 or 19).

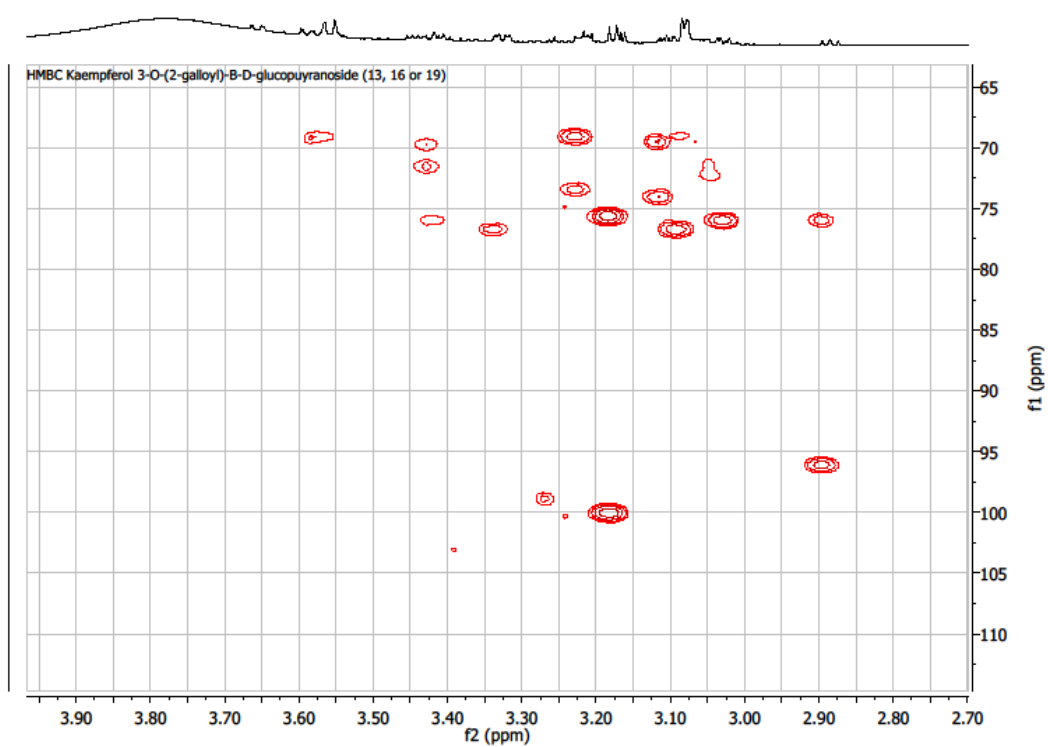

132

133 **Figure S7.** Zoom from 2.7 to 3.9 ppm, HMBC NMR spectrum (DMSO-*d*<sub>6</sub>) of kaempferol  
 134 3-*O*-(2''-galloyl)-β-D-glucopyranoside (13, 16 or 19).

135

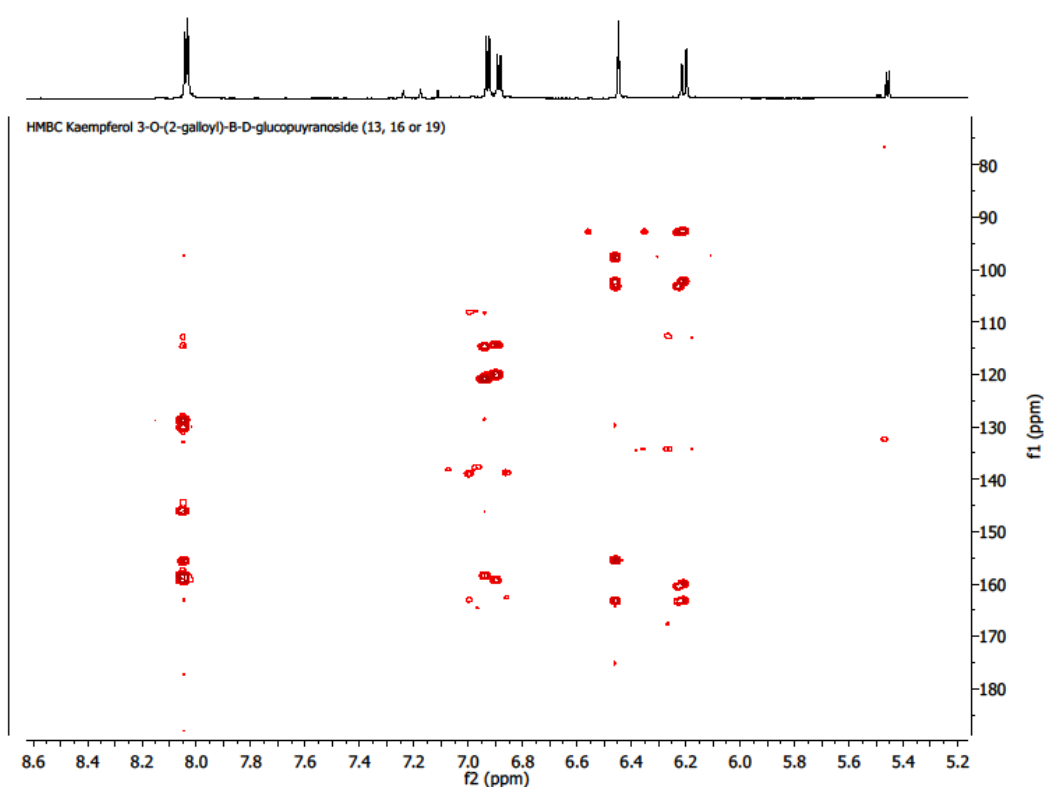

136

137 **Figure S8.** Zoom from 5.2 to 8.6 ppm, HMBC NMR spectrum (DMSO-*d*<sub>6</sub>) of kaempferol  
 138 3-*O*-(2''-galloyl)-β-D-glucopyranoside (13, 16 or 19).

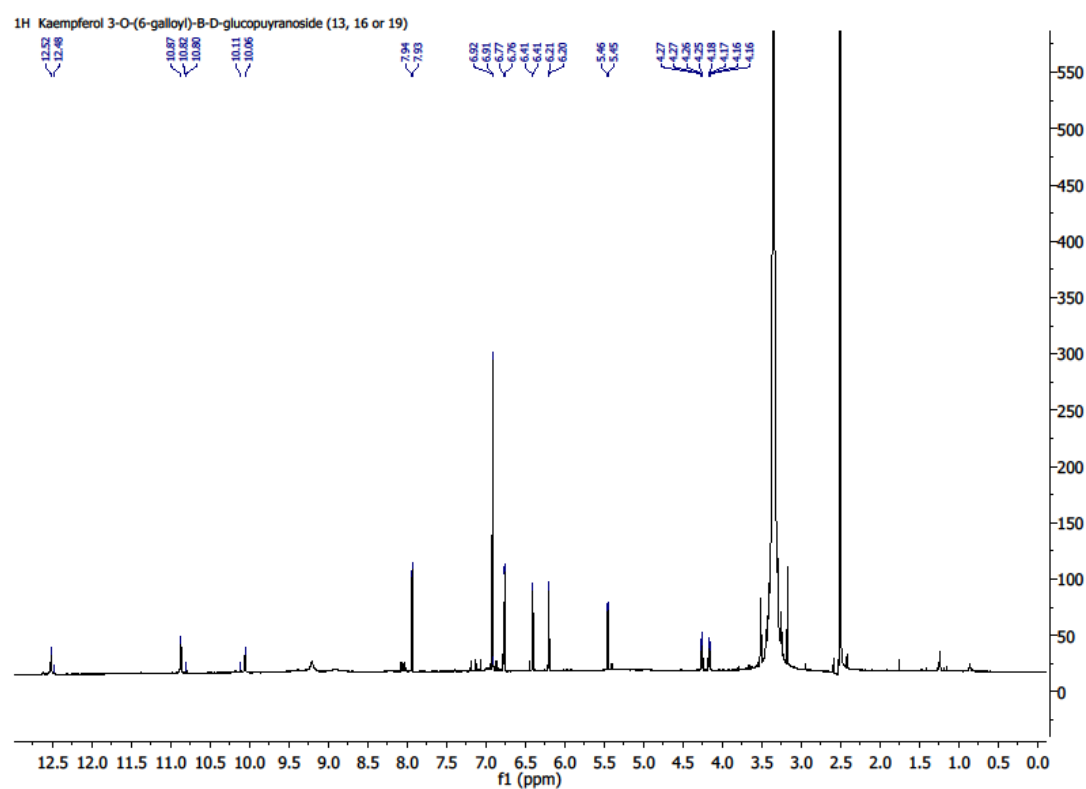

139

140 **Figure S9.** <sup>1</sup>H NMR spectrum (DMSO-*d*<sub>6</sub>) of kaempferol 3-*O*-(6''-galloyl)-β-D-glucopyranoside (13, 16 or 19).

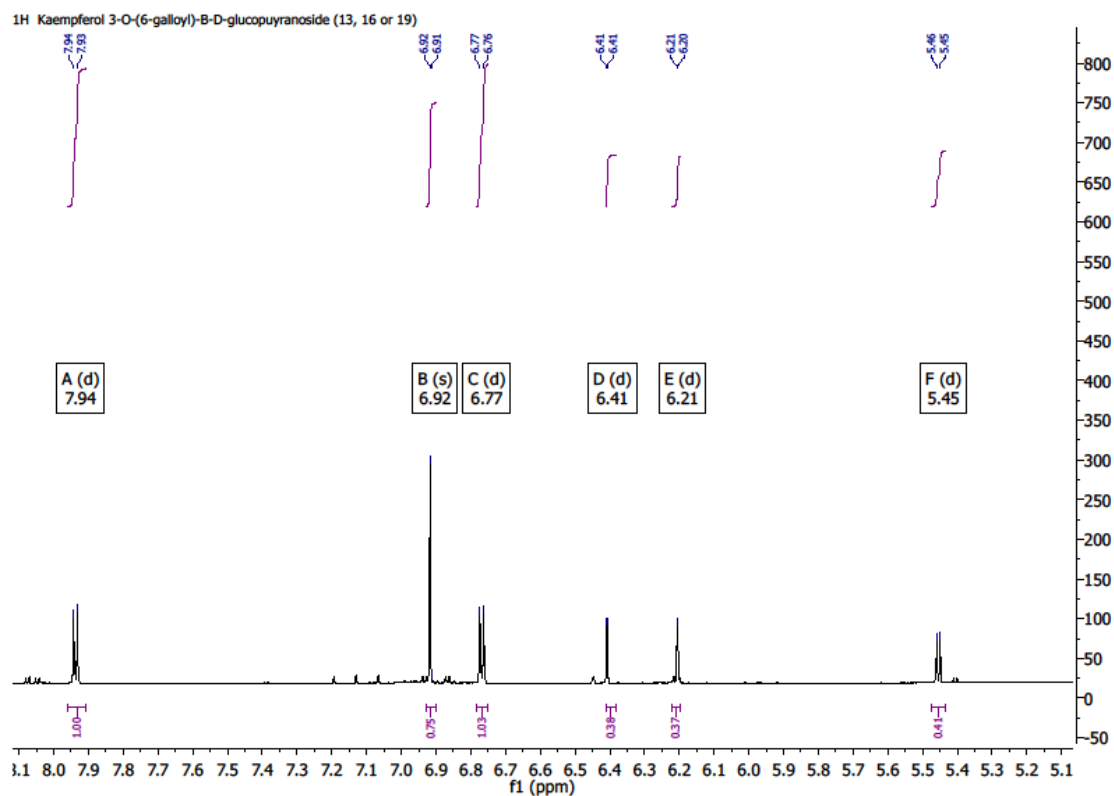

Figure S10. Zoom from 5.1 to 8.1 ppm,  $^1\text{H}$  NMR spectrum (DMSO- $d_6$ ) of kaempferol 3-O-(6''-galloyl)- $\beta$ -D-glucopyranoside (13, 16 or 19).

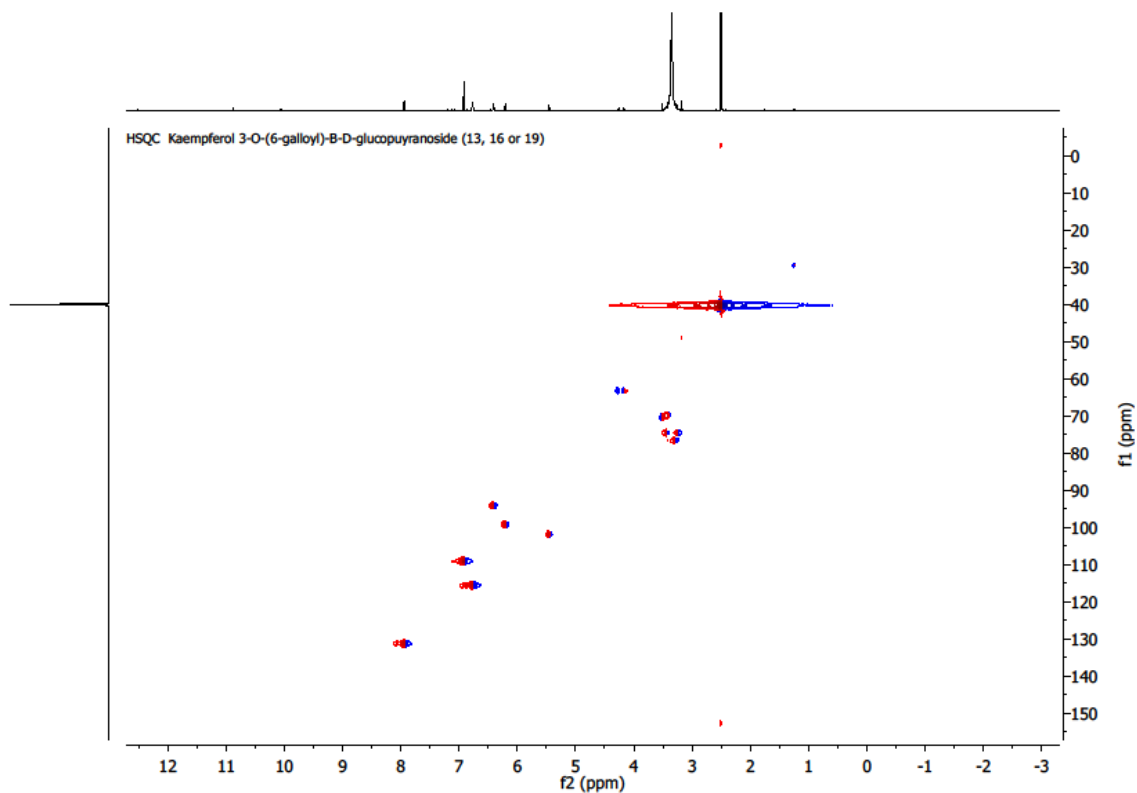

Figure S11. HSQC NMR spectrum (DMSO- $d_6$ ) of kaempferol 3-O-(6''-galloyl)- $\beta$ -D-glucopyranoside (13, 16 or 19).

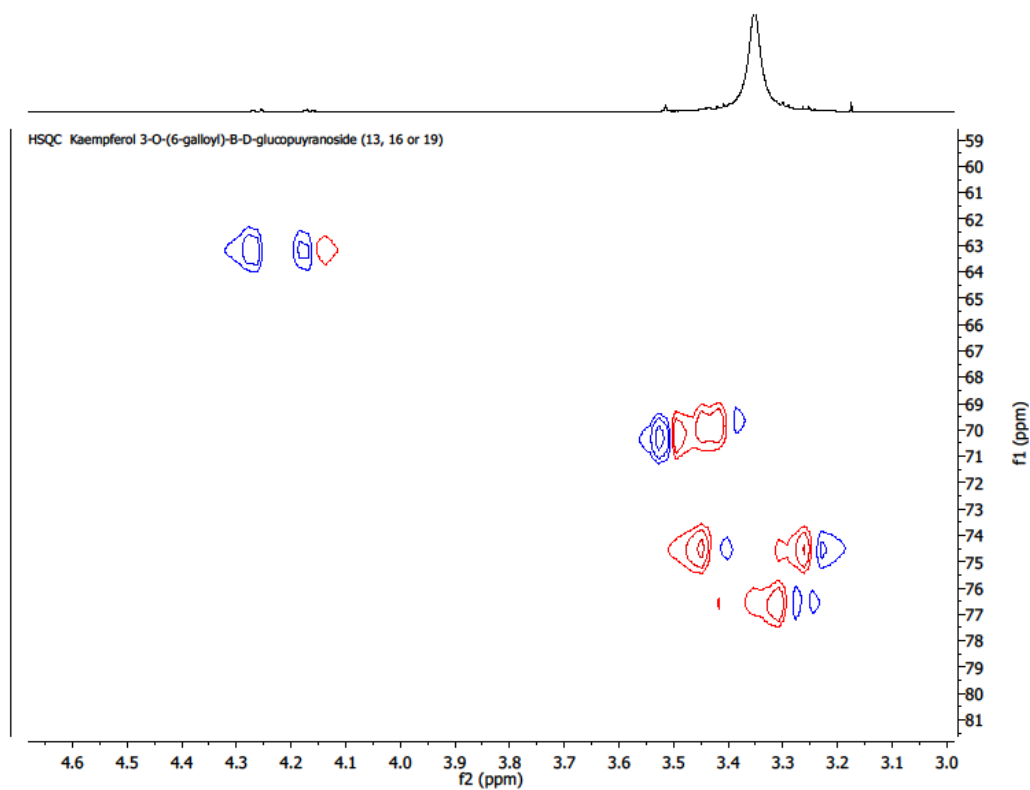

**Figure S12.** Zoom from 3.0 to 4.6 ppm, HSQC NMR spectrum (DMSO-*d*<sub>6</sub>) of kaempferol 3-O-(6''-galloyl)-β-D-glucopyranoside (13, 16 or 19).

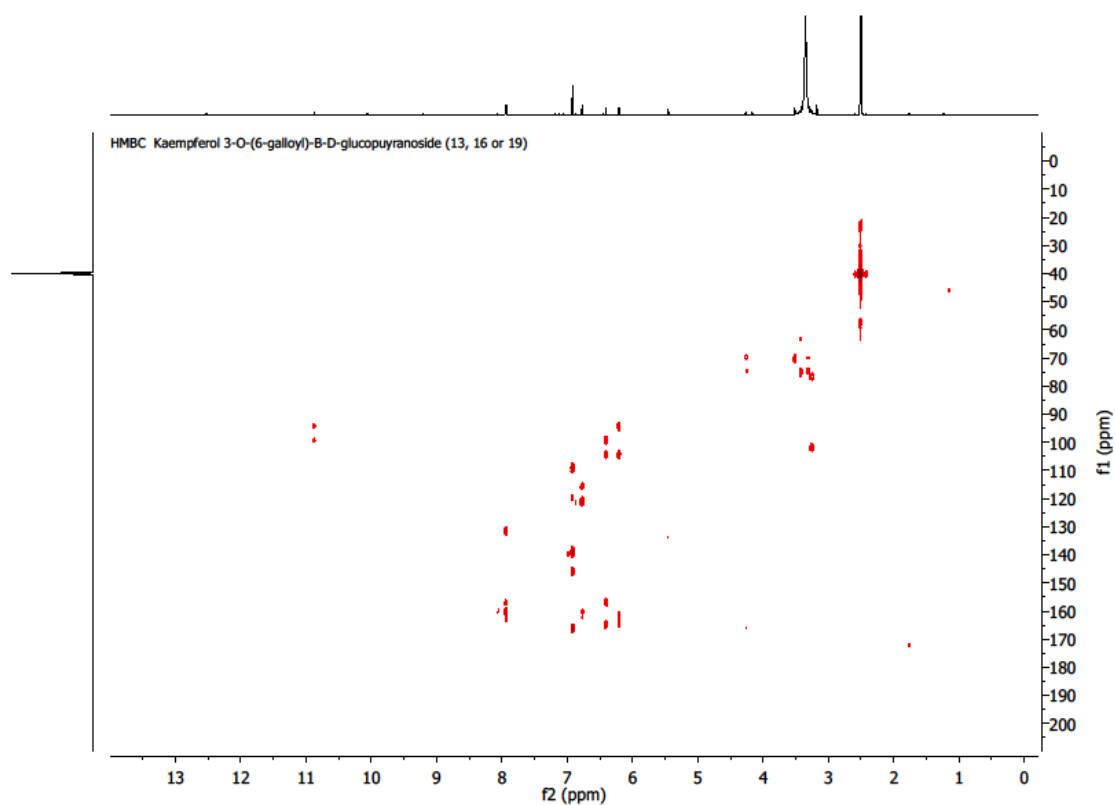

**Figure S13.** HMBC NMR spectrum (DMSO-*d*<sub>6</sub>) of kaempferol 3-O-(6''-galloyl)-β-D-glucopyranoside (13, 16 or 19).



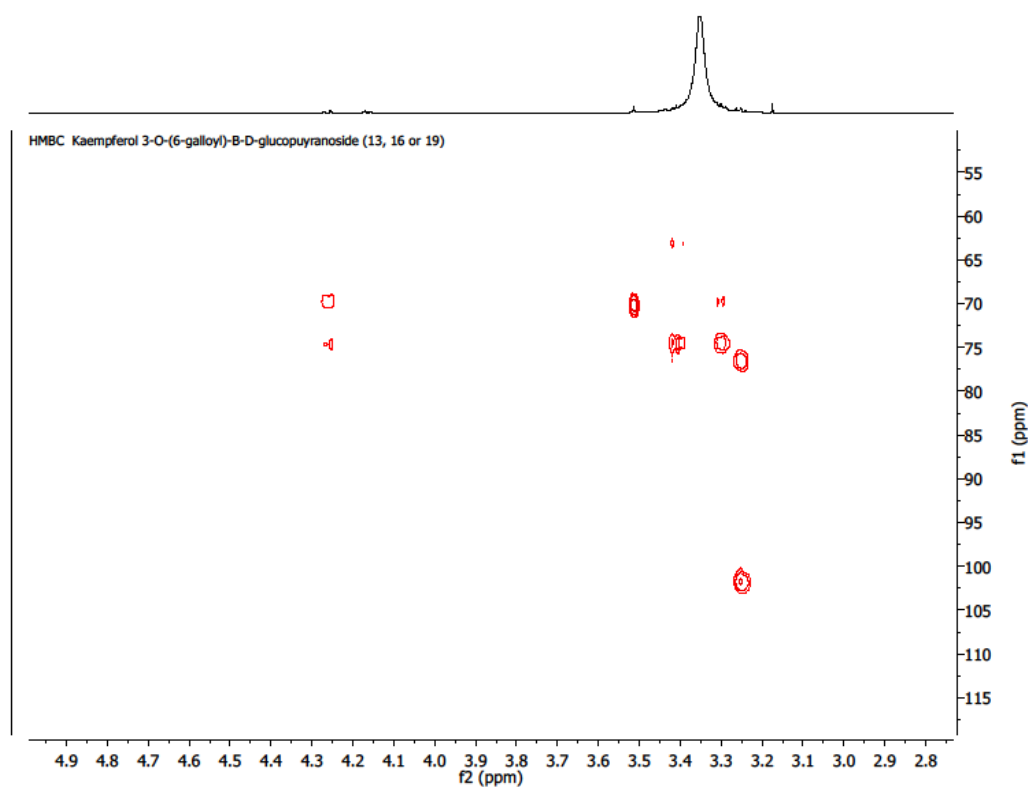

**Figure S14.** Zoom from 2.8 to 4.9 ppm, HMBC NMR spectrum (DMSO-*d*<sub>6</sub>) of kaempferol 3-O-(6''-galloyl)-β-D-glucopyranoside (13, 16 or 19).

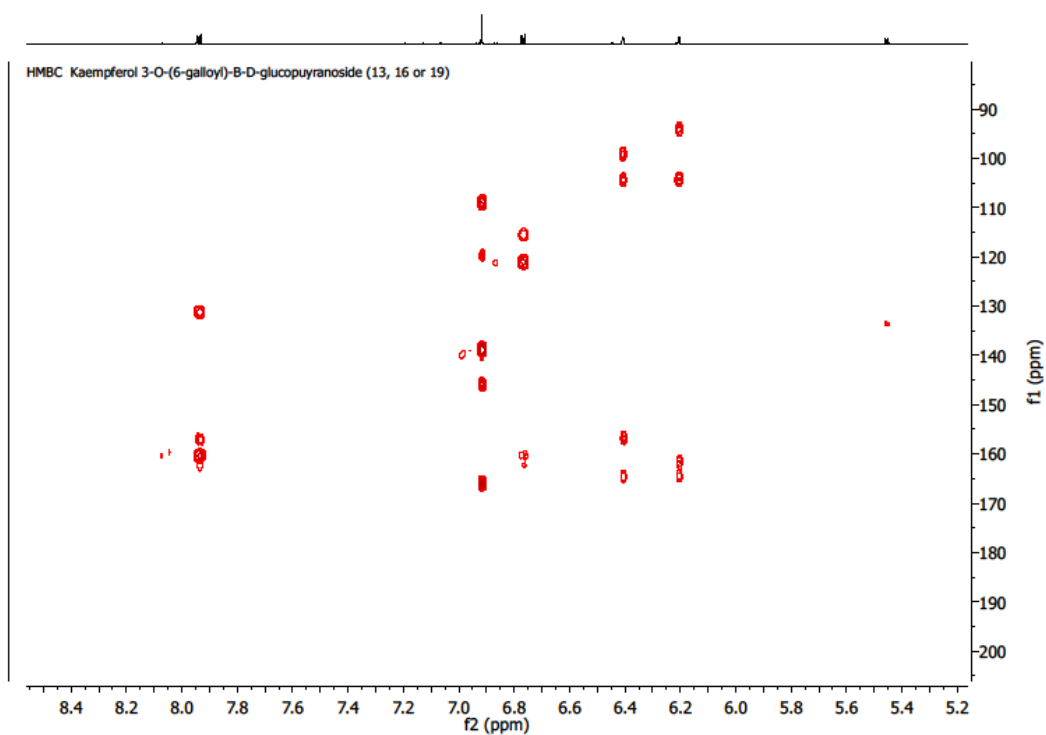

**Figure S15.** Zoom from 5.2 to 8.4 ppm, HMBC NMR spectrum (DMSO-*d*<sub>6</sub>) of kaempferol 3-O-(6''-galloyl)-β-D-glucopyranoside (13, 16 or 19).

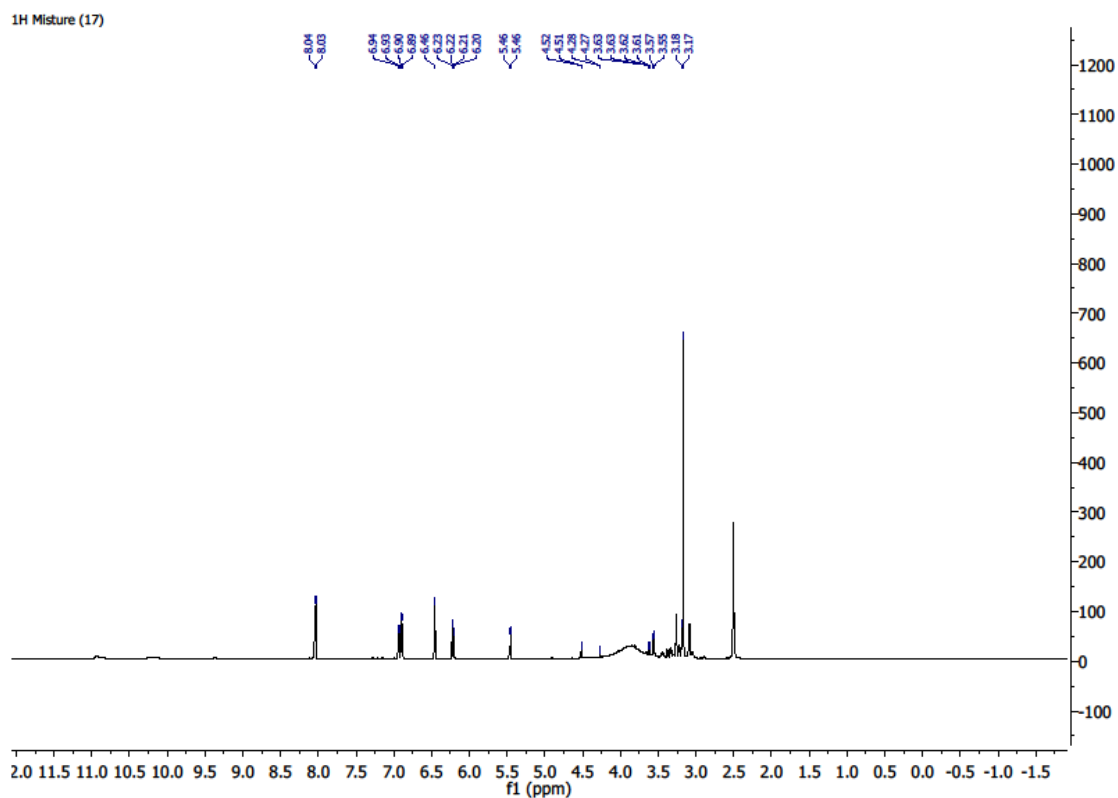

Figure S16.  $^1\text{H}$  NMR spectrum ( $\text{DMSO}-d_6$ ) of mixture (17).

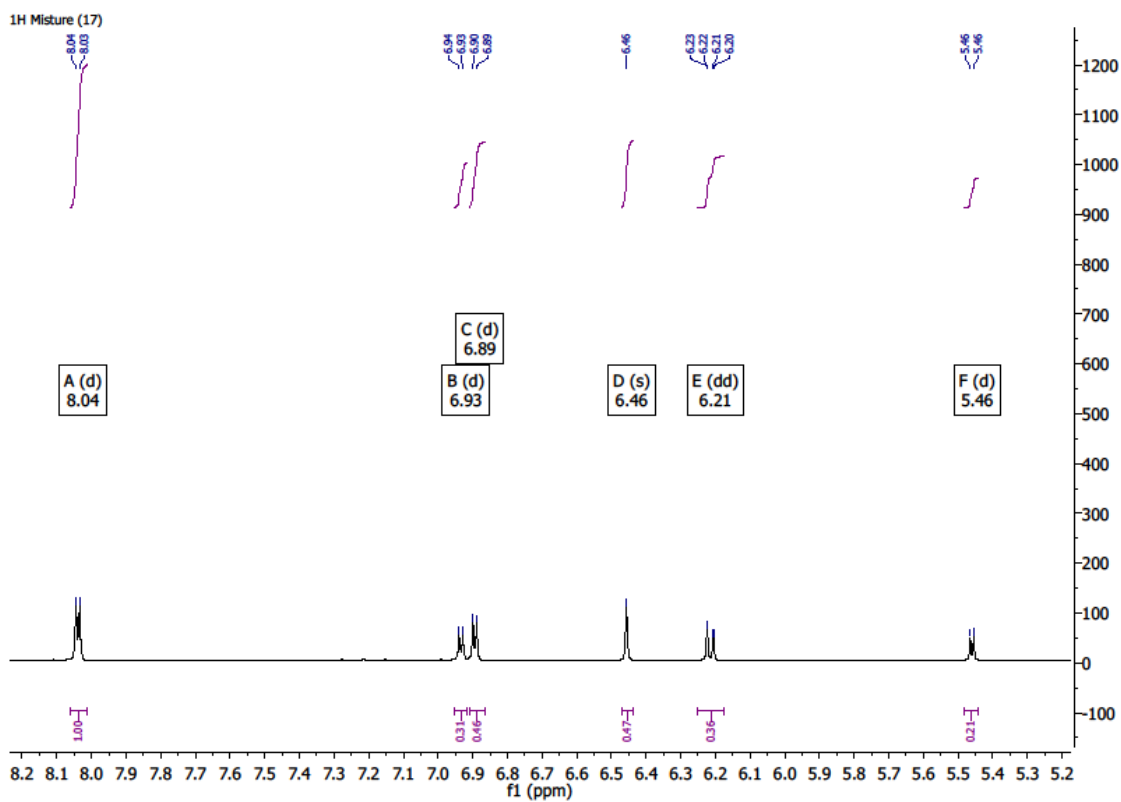

Figure S17. Zoom from 5.2 to 8.2 ppm,  $^1\text{H}$  NMR spectrum ( $\text{DMSO}-d_6$ ) of mixture (17).

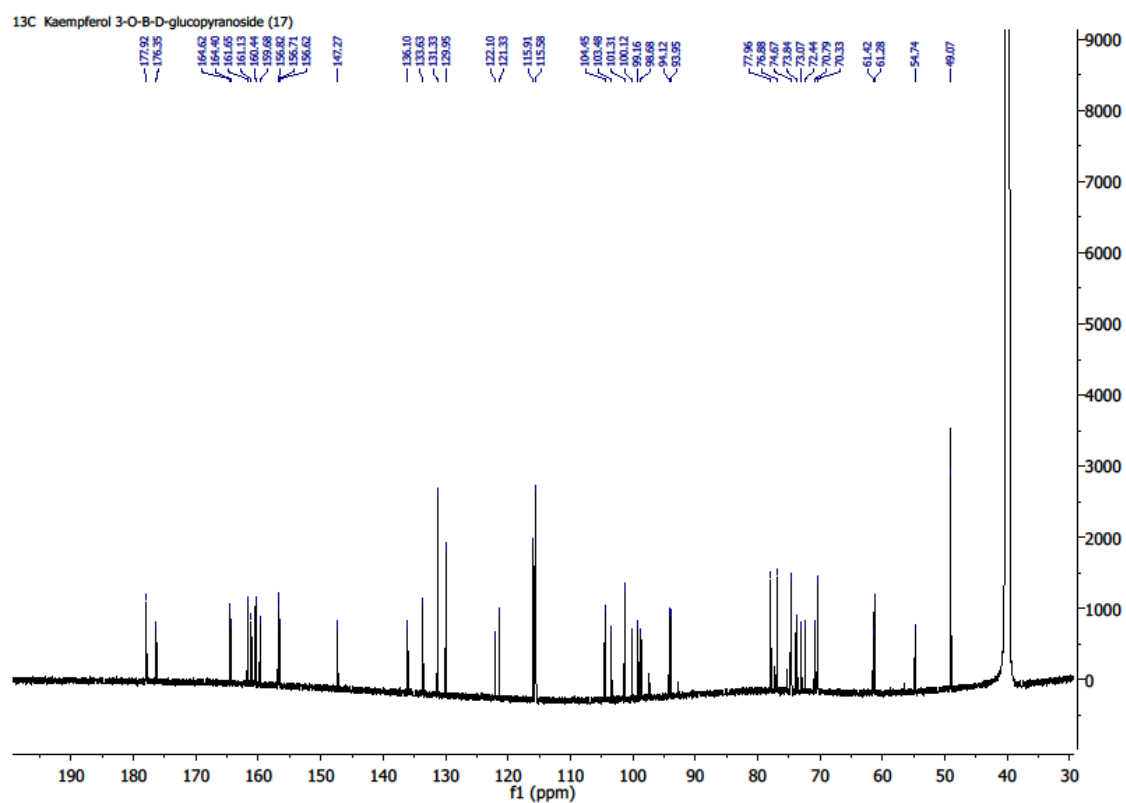

Figure S18.  $^{13}\text{C}$  NMR spectrum ( $\text{DMSO-}d_6$ ) of mixture (17).

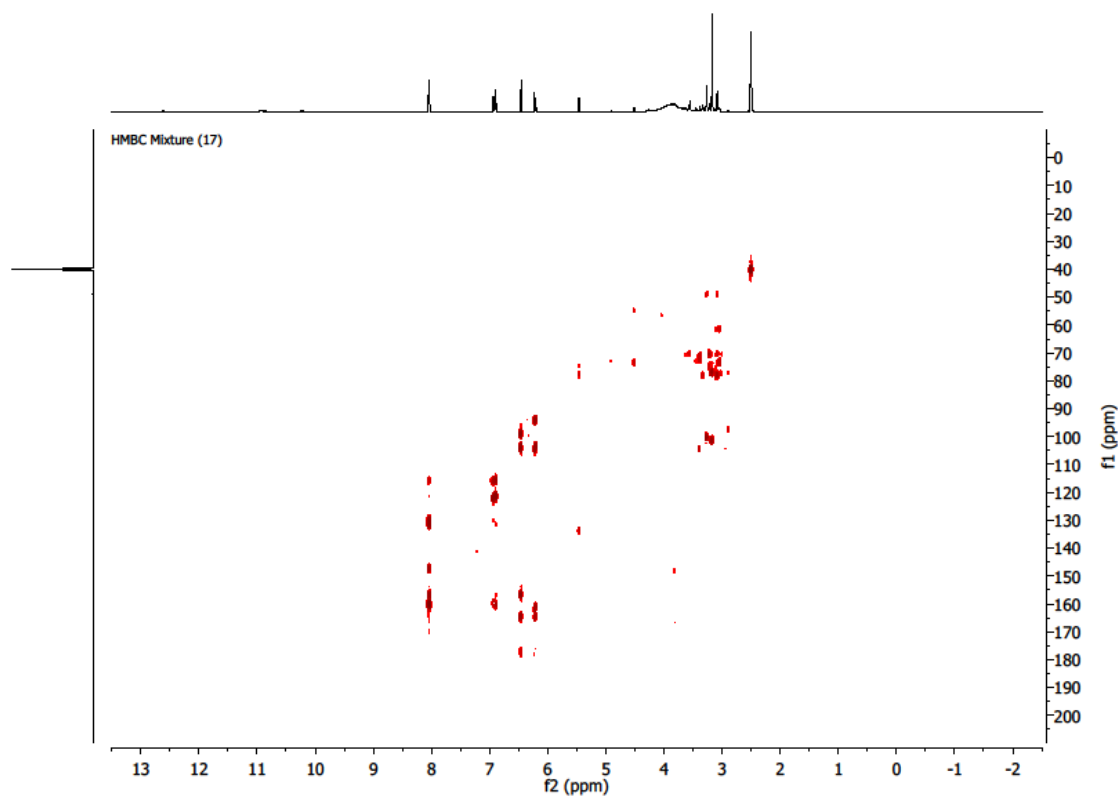

Figure S19. HMBC NMR spectrum ( $\text{DMSO-}d_6$ ) of mixture (17).

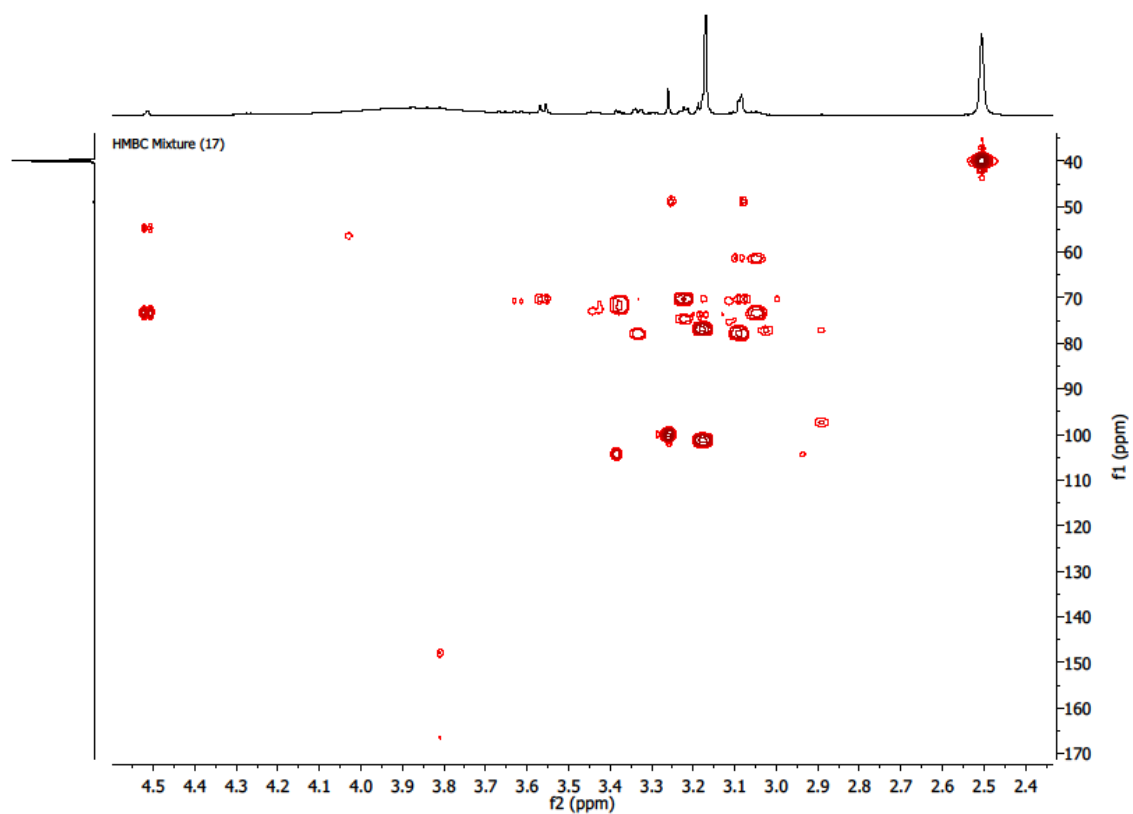

168

169

Figure S20. Zoom from 2.4 to 4.5 ppm, HMBC NMR spectrum (DMSO-*d*<sub>6</sub>) of mixture (17).

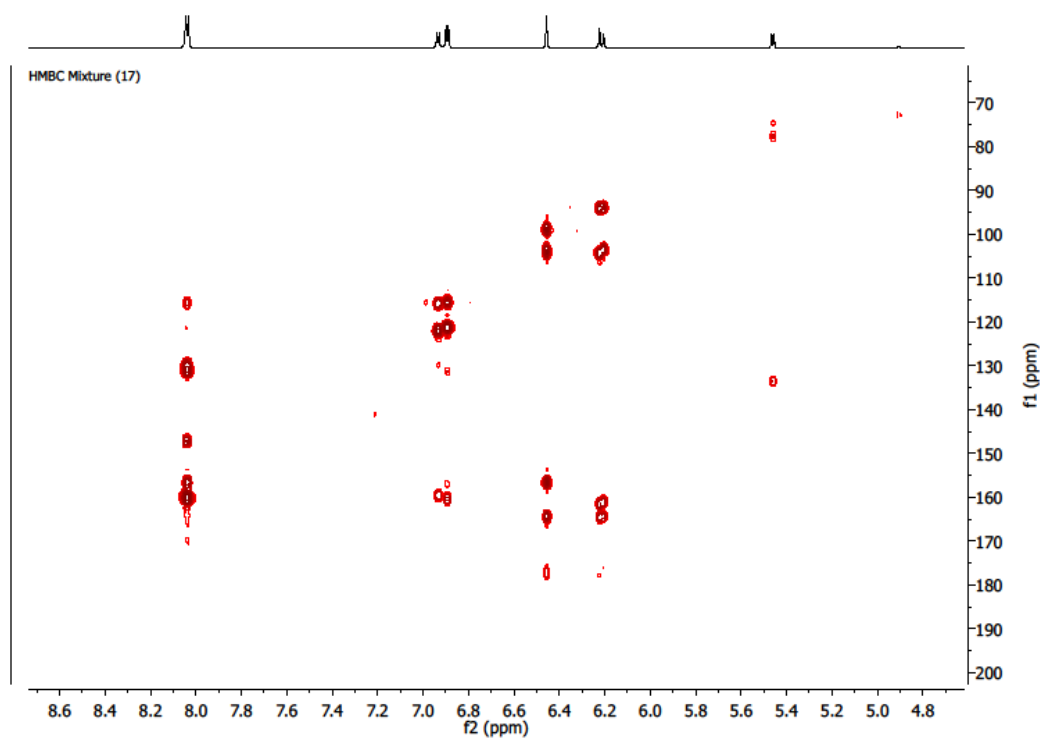

170

171

Figure S21. Zoom from 4.8 to 8.6 ppm, HMBC NMR spectrum (DMSO-*d*<sub>6</sub>) of mixture (17).

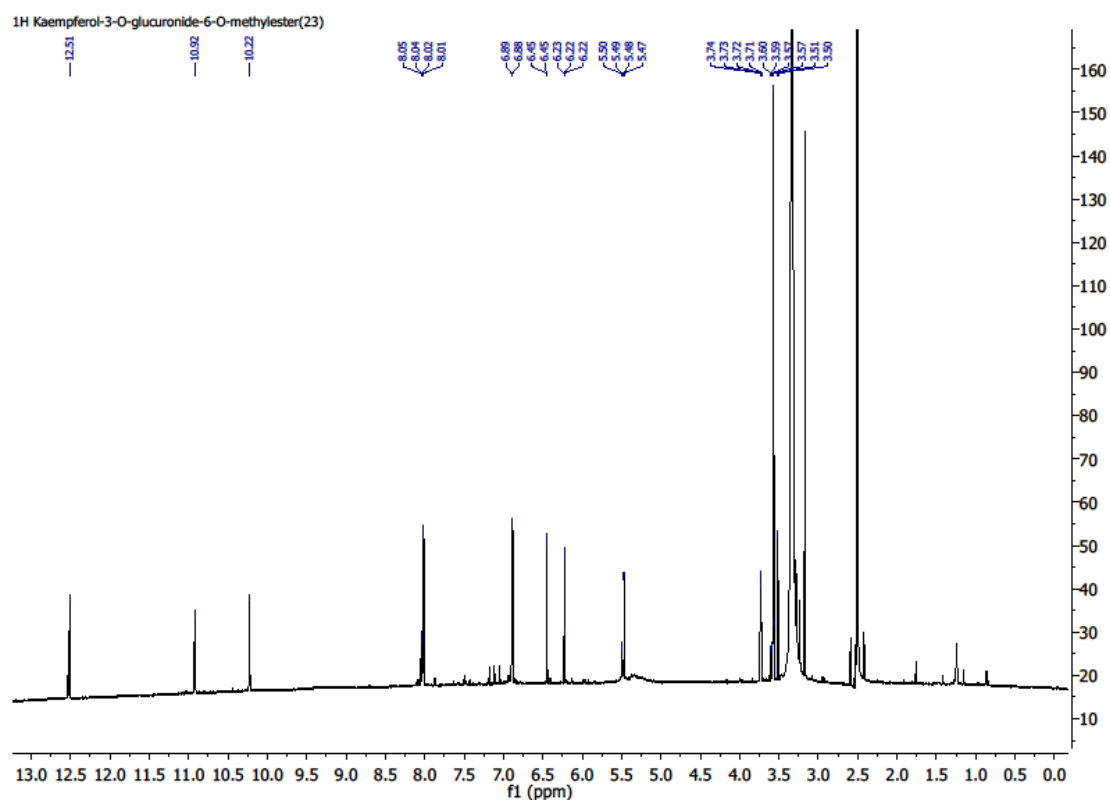

Figure S22.  $^1\text{H}$  NMR spectrum (DMSO- $d_6$ ) of kaempferol 3- $O$ -glucuronide-6''- $O$ -methylester (23).

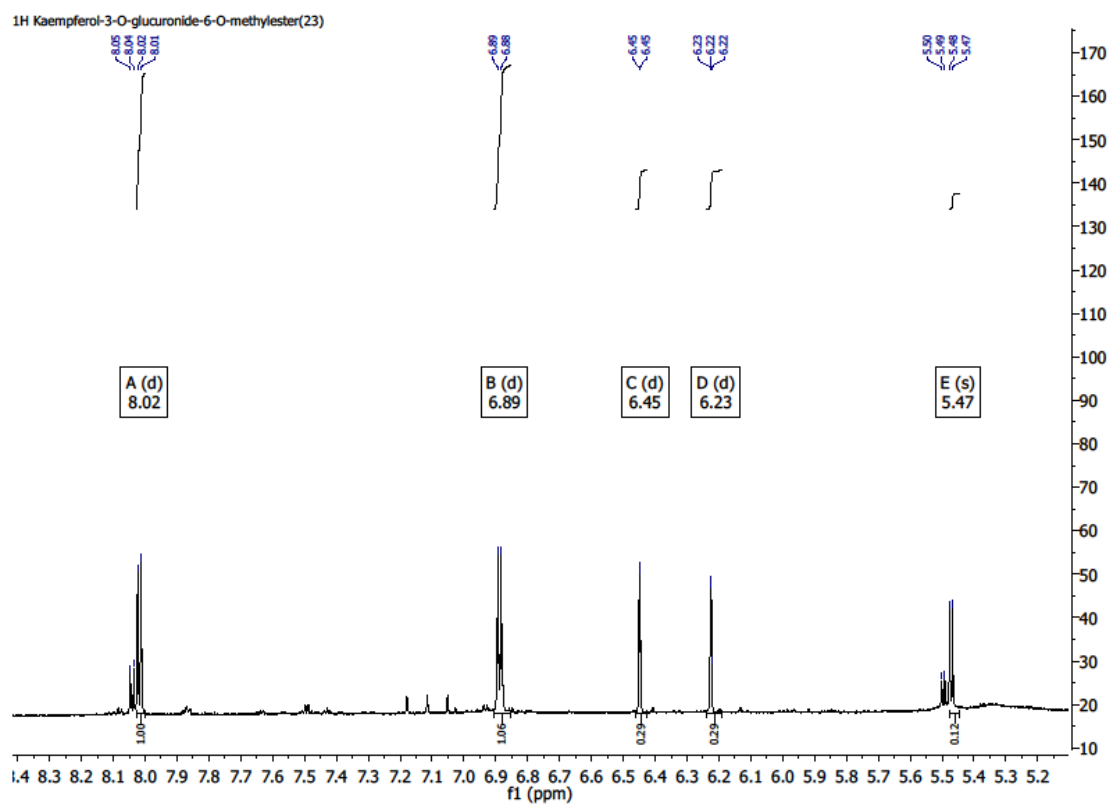

Figure S23. Zoom from 5.1 to 8.1 ppm,  $^1\text{H}$  NMR spectrum (DMSO- $d_6$ ) of kaempferol 3- $O$ -glucuronide-6''- $O$ -methylester (23).

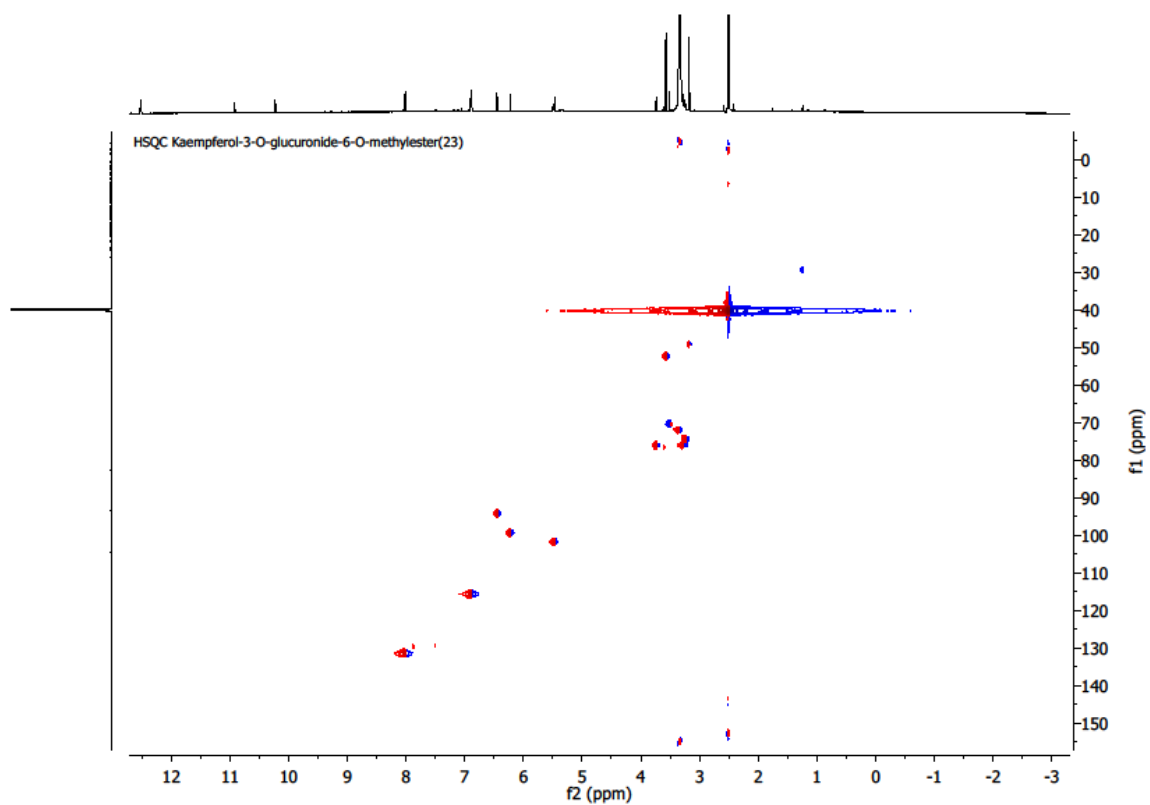

Figure S24. HSQC NMR spectrum (DMSO-*d*<sub>6</sub>) of kaempferol 3-*O*-glucuronide-6''-*O*-methylester (23).

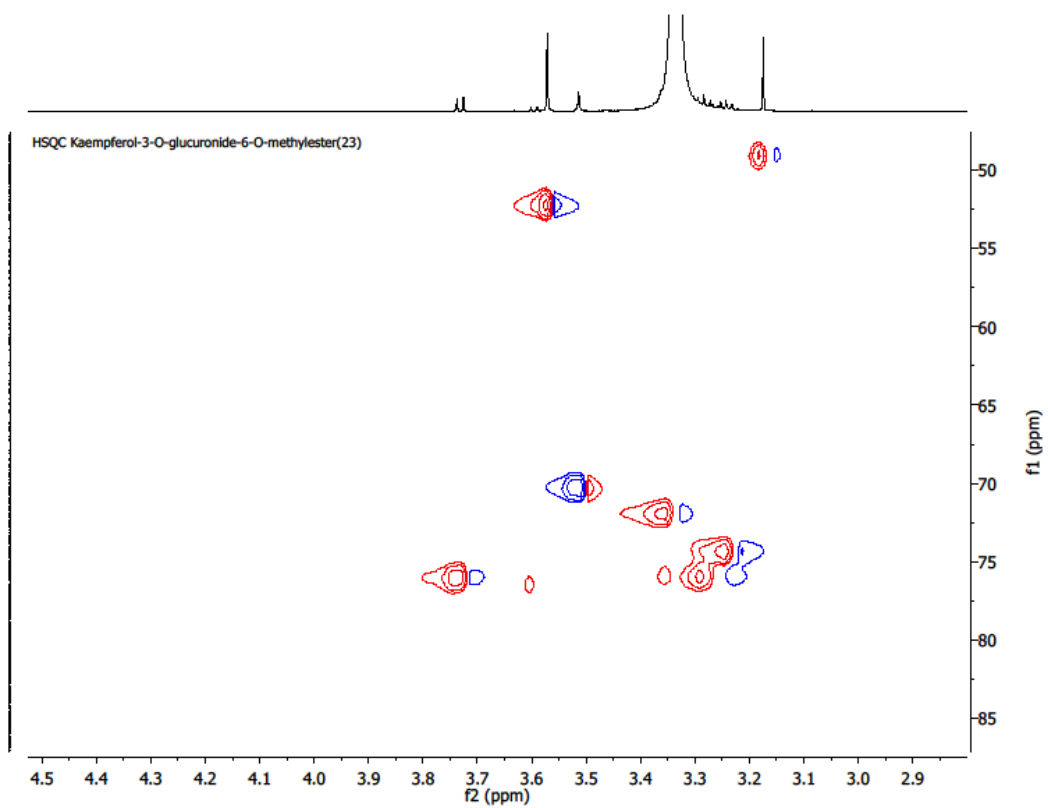

Figure S25. Zoom from 2.9 to 4.5 ppm, HSQC NMR spectrum (DMSO-*d*<sub>6</sub>) of kaempferol 3-*O*-glucuronide-6''-*O*-methylester (23).

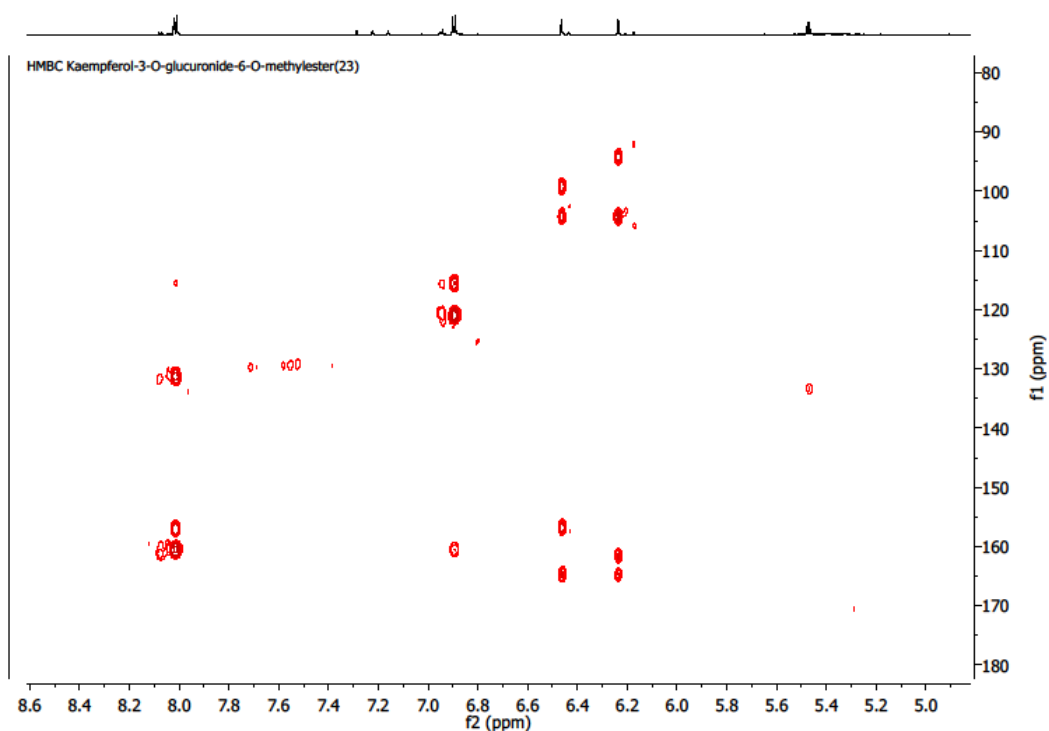

182

183 Figure S26. Zoom from 5.0 to 8.6 ppm, HMBC NMR spectrum (DMSO-*d*<sub>6</sub>) of kaempferol  
 184 3-*O*-glucuronide-6''-*O*-methylester (23).

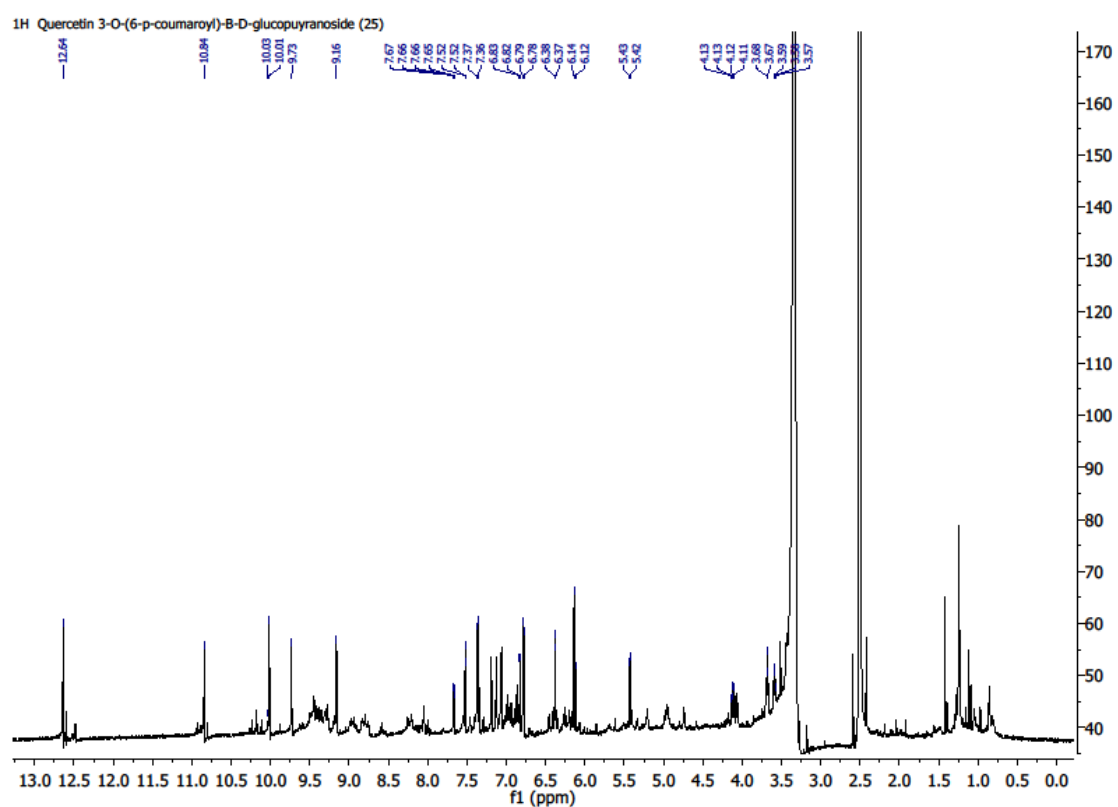

185

186 Figure S27. <sup>1</sup>H NMR spectrum (DMSO-*d*<sub>6</sub>) of Quercetin 3-*O*-(6''-*p*-coumaroyl)-β-D-glucopyranoside (25).

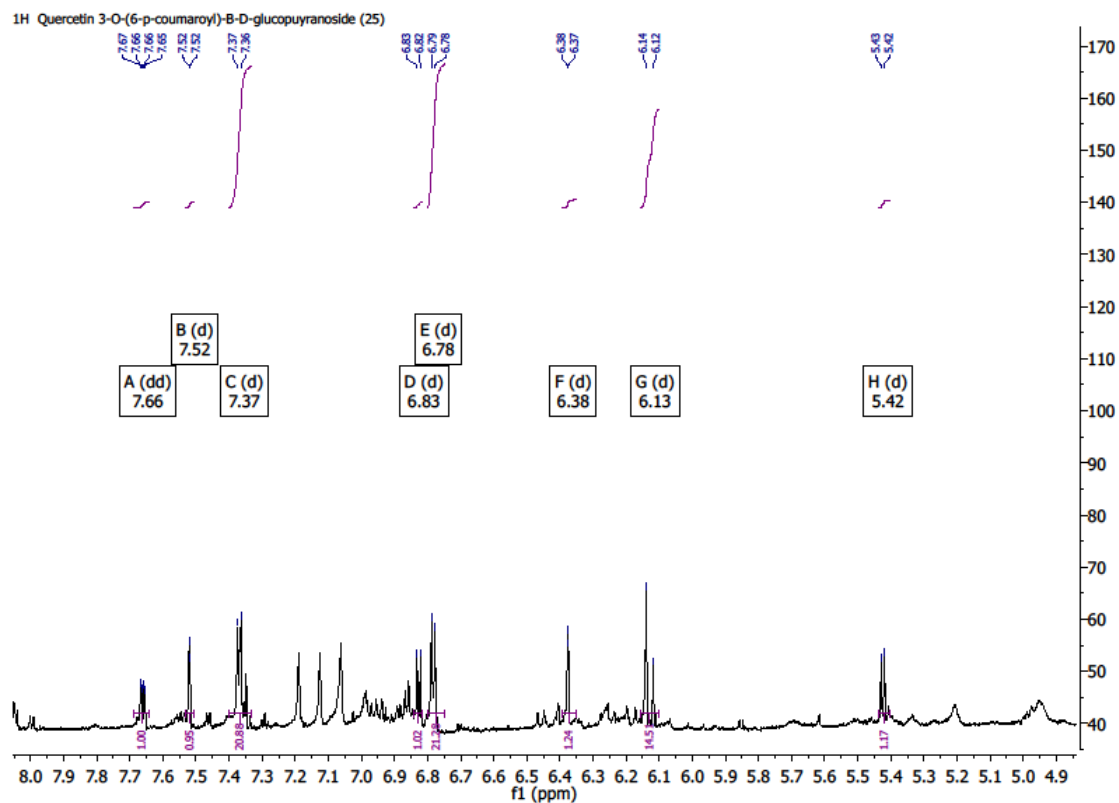

Figure S28. Zoom from 5.1 to 8.1 ppm,  $^1\text{H}$  NMR spectrum ( $\text{DMSO}-d_6$ ) of Quercetin 3-O-(6''-p-coumaroyl)-β-D-glucopyranoside (25).

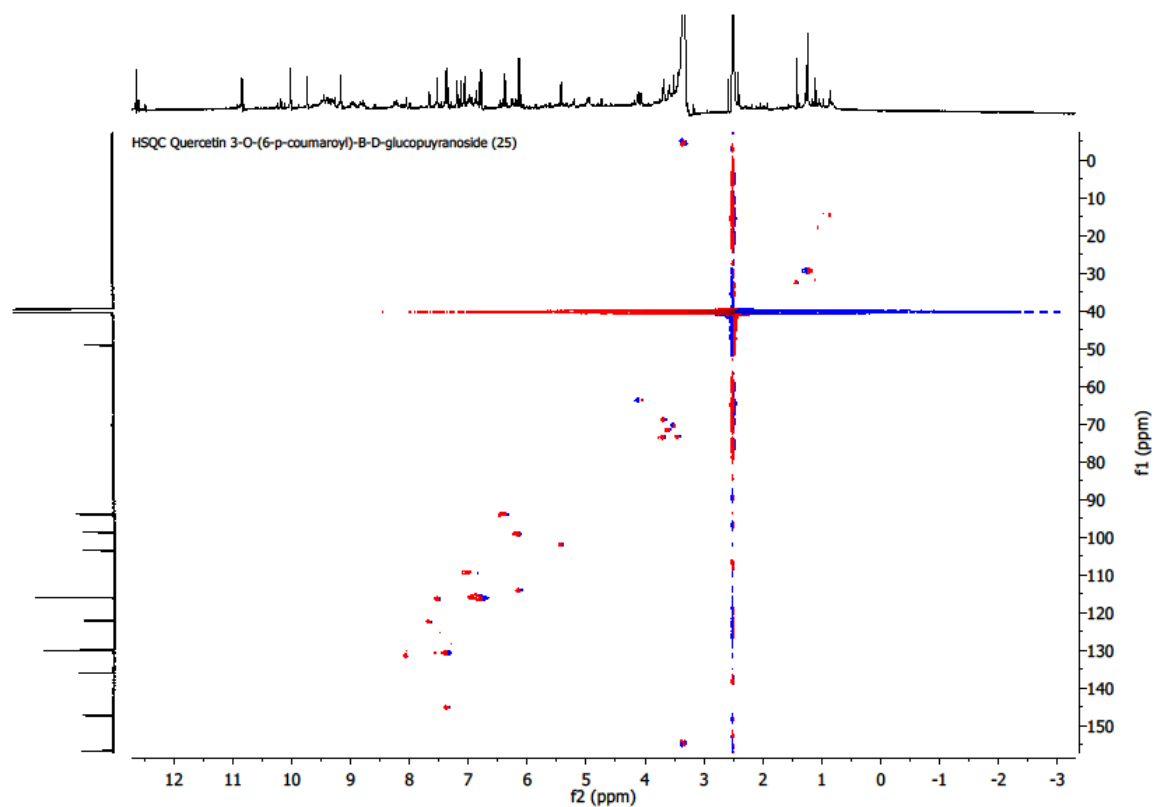

Figure S29. HSQC NMR spectrum ( $\text{DMSO}-d_6$ ) of Quercetin 3-O-(6''-p-coumaroyl)-β-D-glucopyranoside (25).



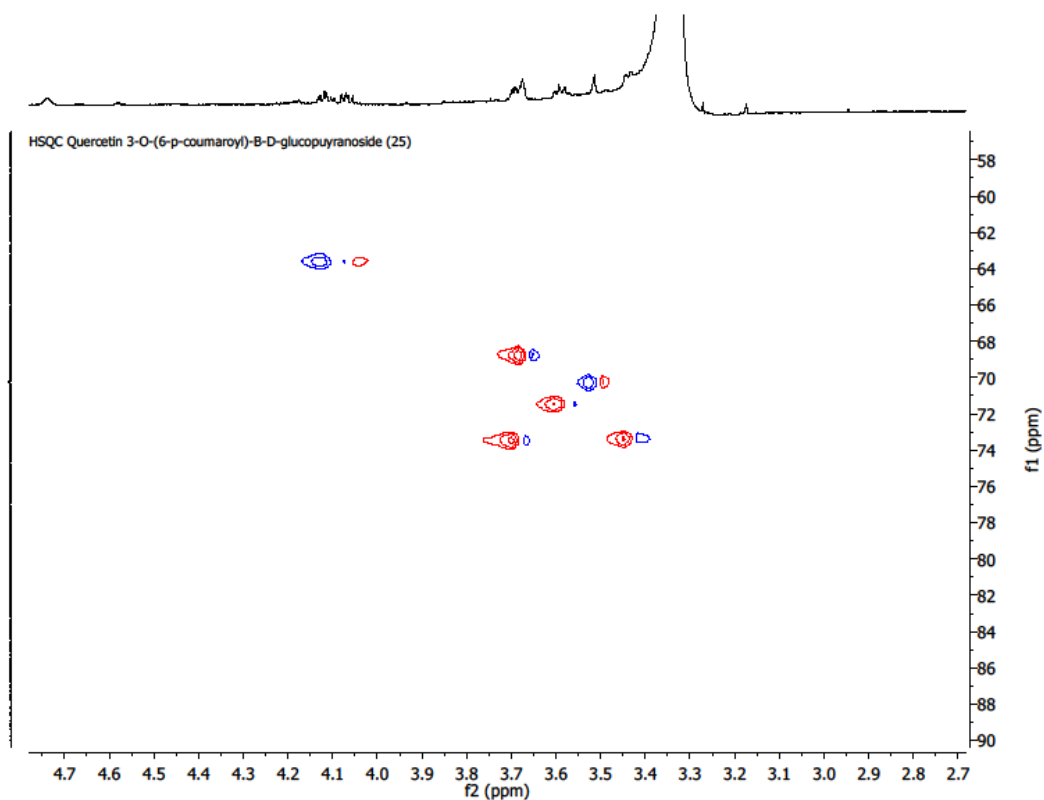

Figure S30. Zoom from 2.7 to 4.7 ppm, HSQC NMR spectrum (DMSO-*d*<sub>6</sub>) of Quercetin 3-O-(6''-*p*-coumaroyl)-β-D-glucopyranoside (25).

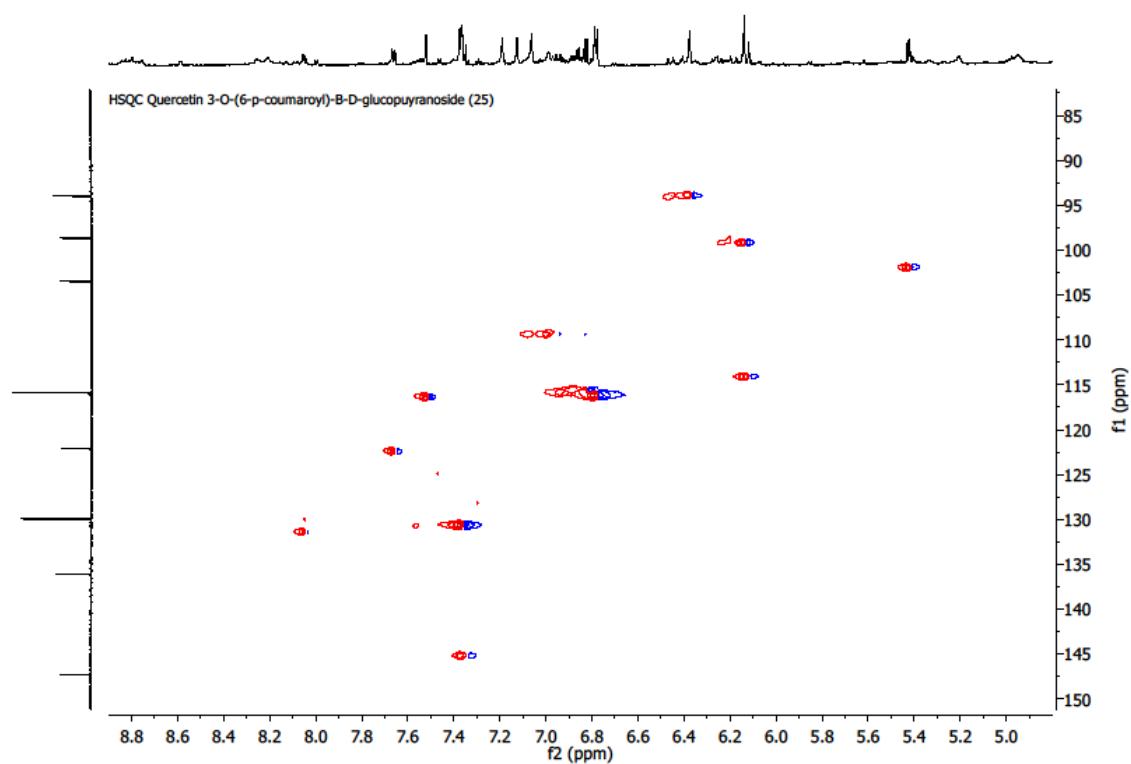

Figure S31. Zoom from 5.0 to 8.8 ppm, HSQC NMR spectrum (DMSO-*d*<sub>6</sub>) of Quercetin 3-O-(6''-*p*-coumaroyl)-β-D-glucopyranoside (25).

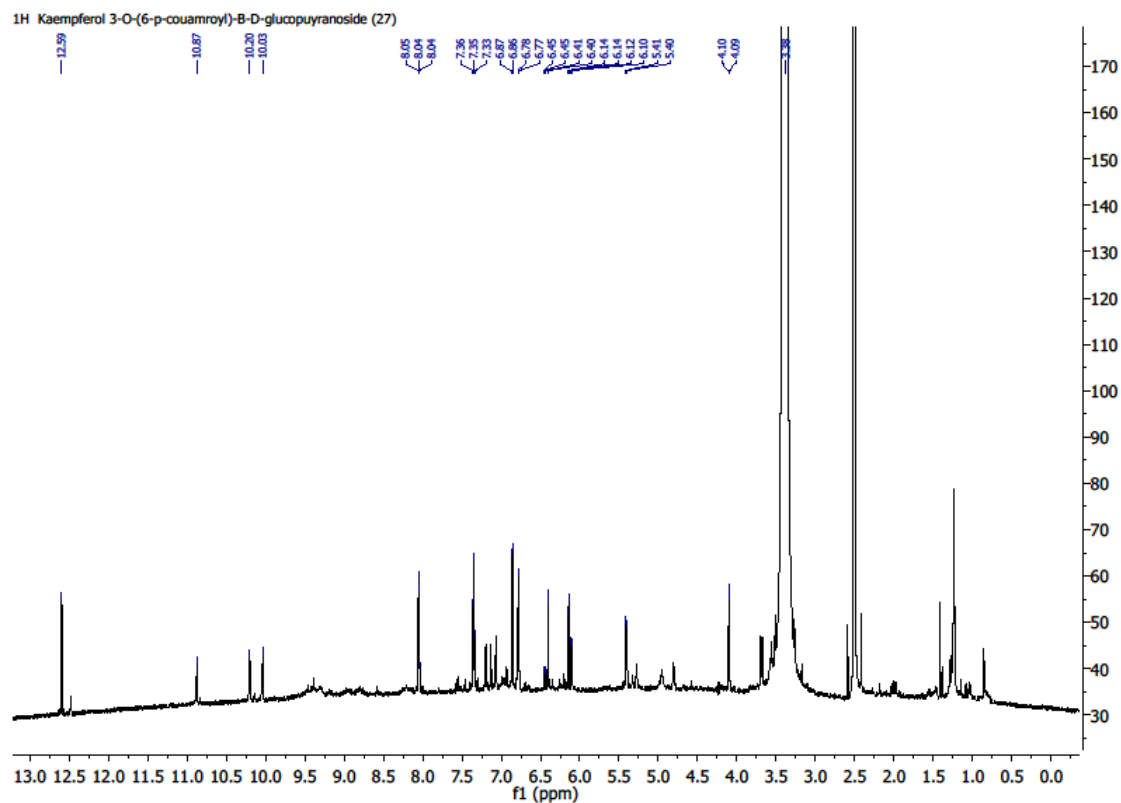

Figure S32.  $^1\text{H}$  NMR spectrum (DMSO- $d_6$ ) of Kaempferol 3-O-(6''-*p*-coumaroyl)- $\beta$ -D-glucopyranoside (27).

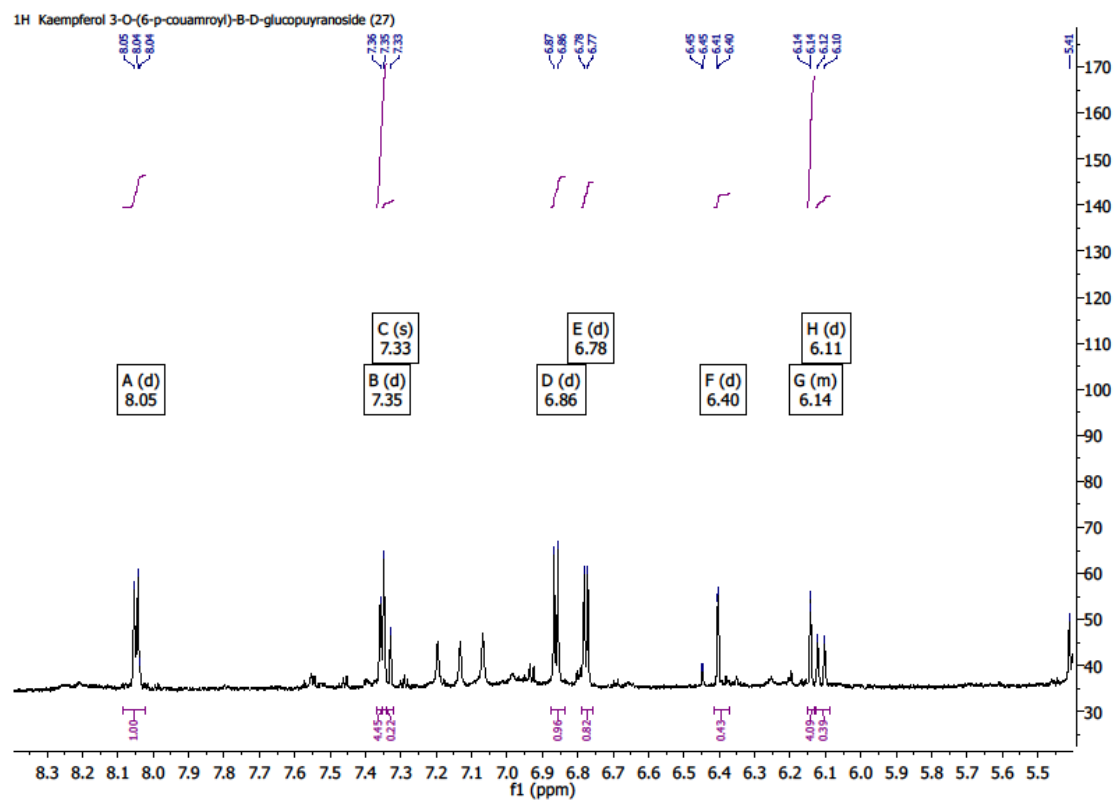

Figure S33. Zoom from 5.1 to 8.1 ppm,  $^1\text{H}$  NMR spectrum (DMSO- $d_6$ ) of Kaempferol 3-O-(6''-*p*-coumaroyl)- $\beta$ -D-glucopyranoside (27).

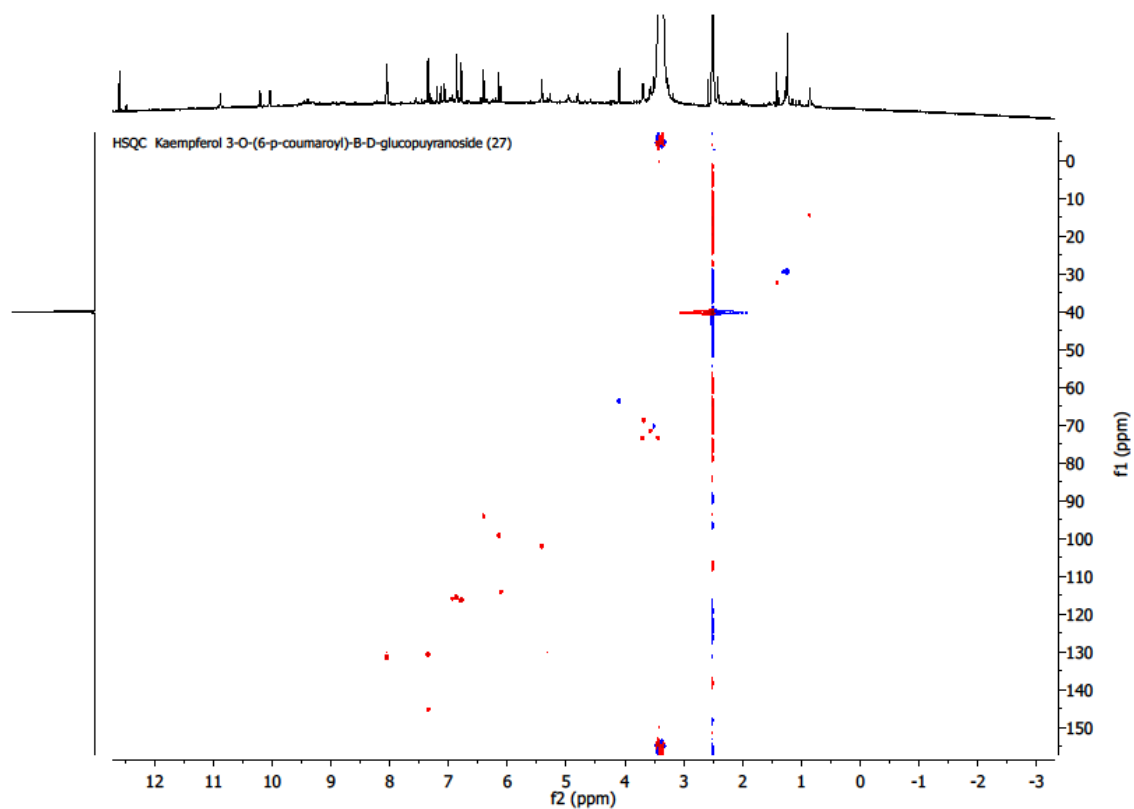

Figure S34. HSQC NMR spectrum (DMSO-*d*<sub>6</sub>) of Kaempferol 3-*O*-(6''-*p*-coumaroyl)-β-D-glucopyranoside (27).

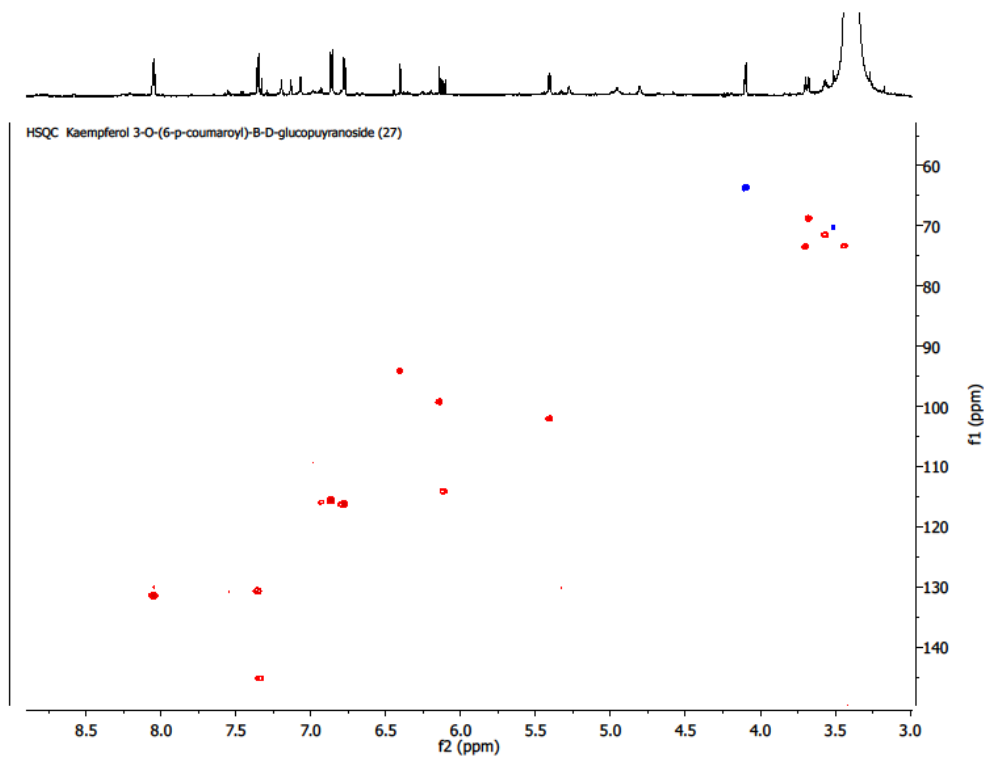

Figure S35. Zoom from 3.0 to 4.6 ppm, HSQC NMR spectrum (DMSO-*d*<sub>6</sub>) of Kaempferol 3-*O*-(6''-*p*-coumaroyl)-β-D-glucopyranoside (27).

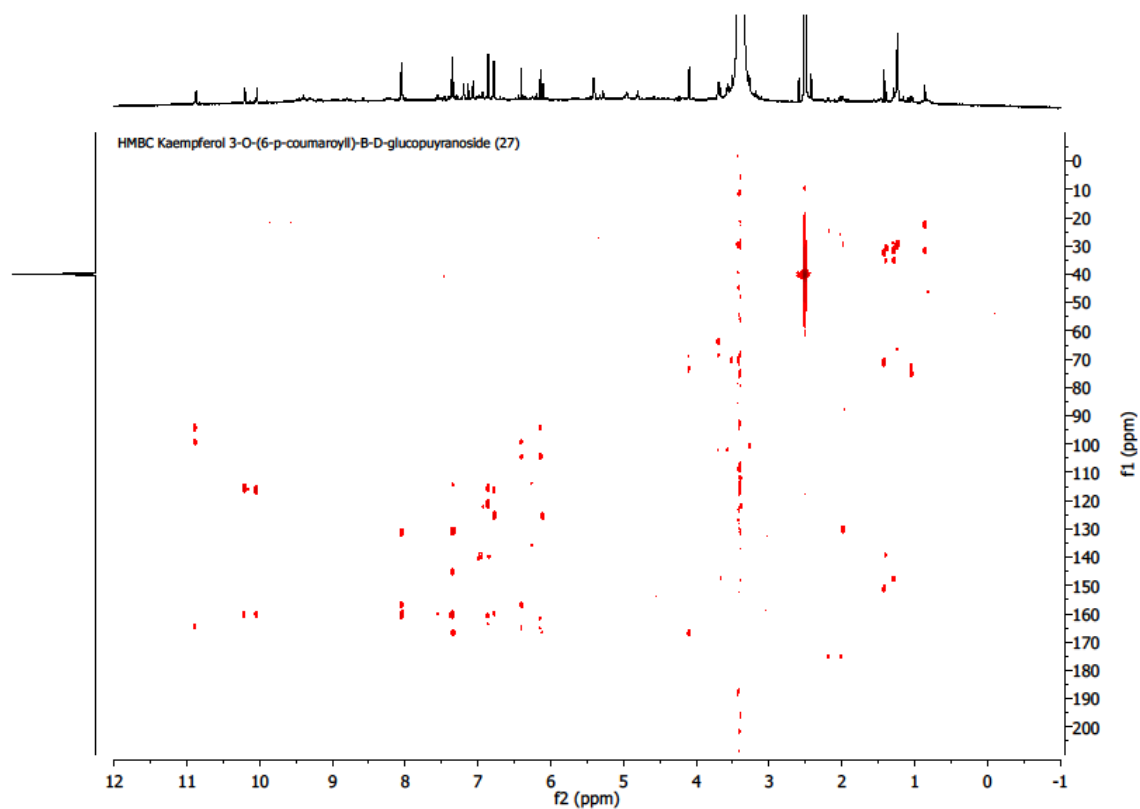

Figure S36. HMBC NMR spectrum (DMSO-*d*<sub>6</sub>) of Kaempferol 3-O-(6''-*p*-coumaroyl)-β-D-glucopyranoside (27).

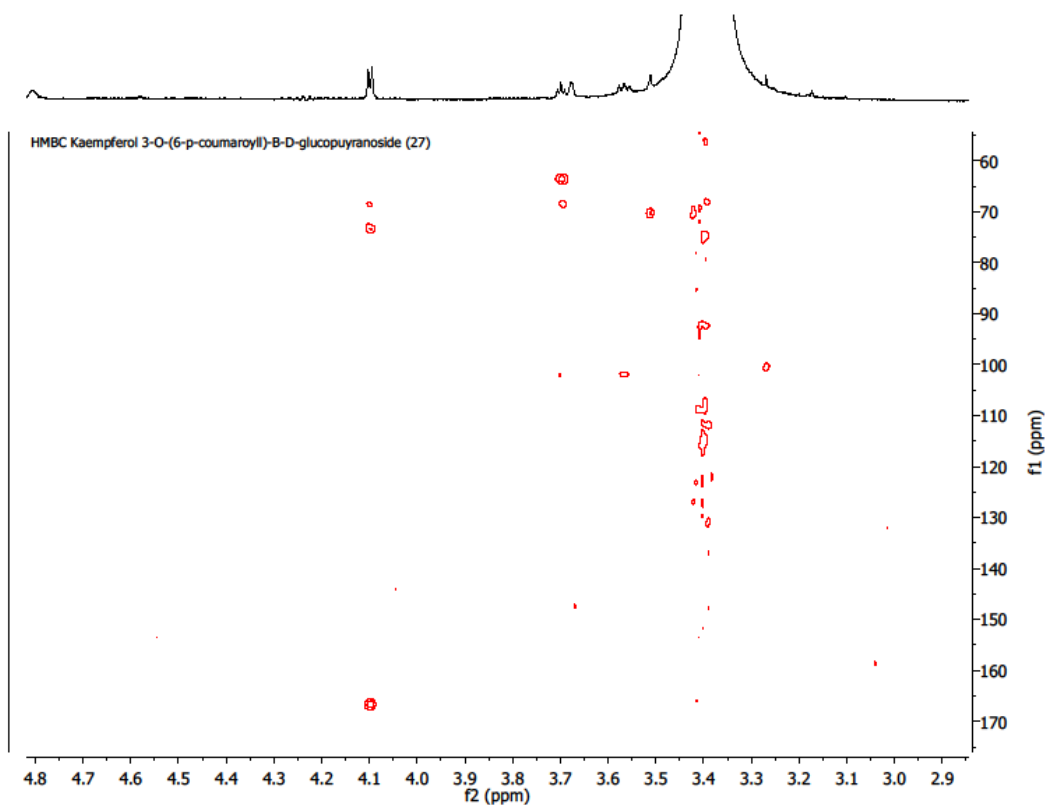

Figure S37. Zoom from 2.9 to 4.8 ppm, HMBC NMR spectrum (DMSO-*d*<sub>6</sub>) of Kaempferol 3-O-(6''-*p*-coumaroyl)-β-D-glucopyranoside (27).

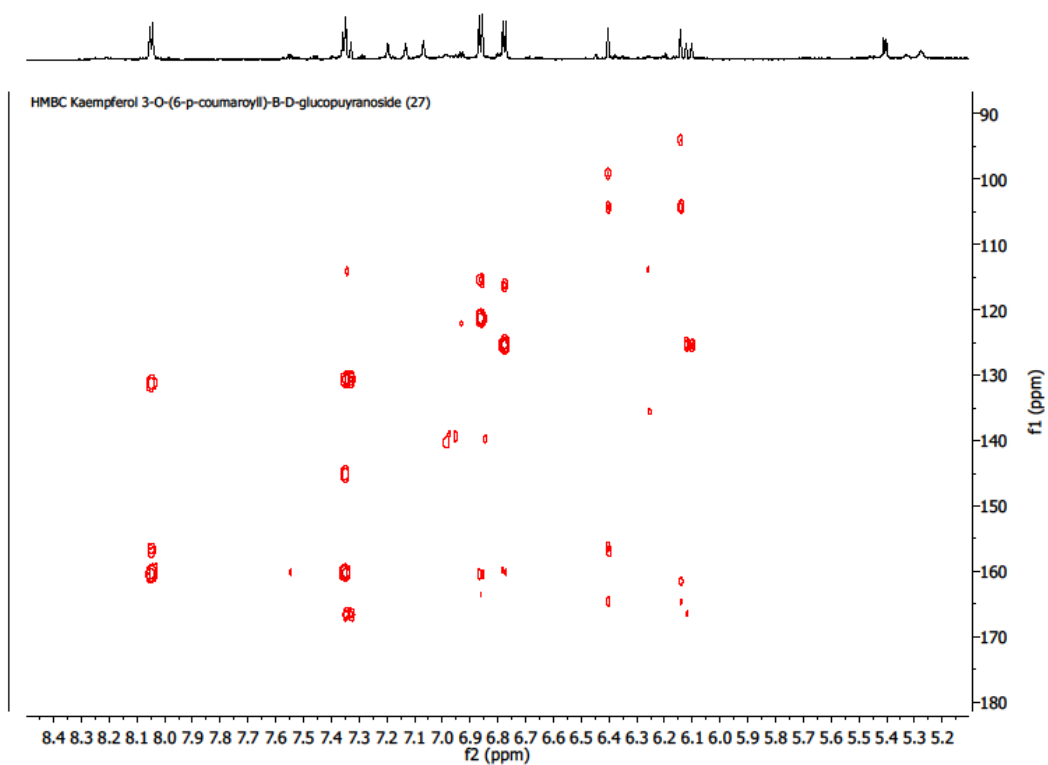

214

215 **Figure S38.** Zoom from 5.2 to 8.4 ppm, HMBC NMR spectrum (DMSO-*d*<sub>6</sub>) of Kaempferol  
 216 3-O-(6''-*p*-coumaroyl)-β-D-glucopyranoside (27).

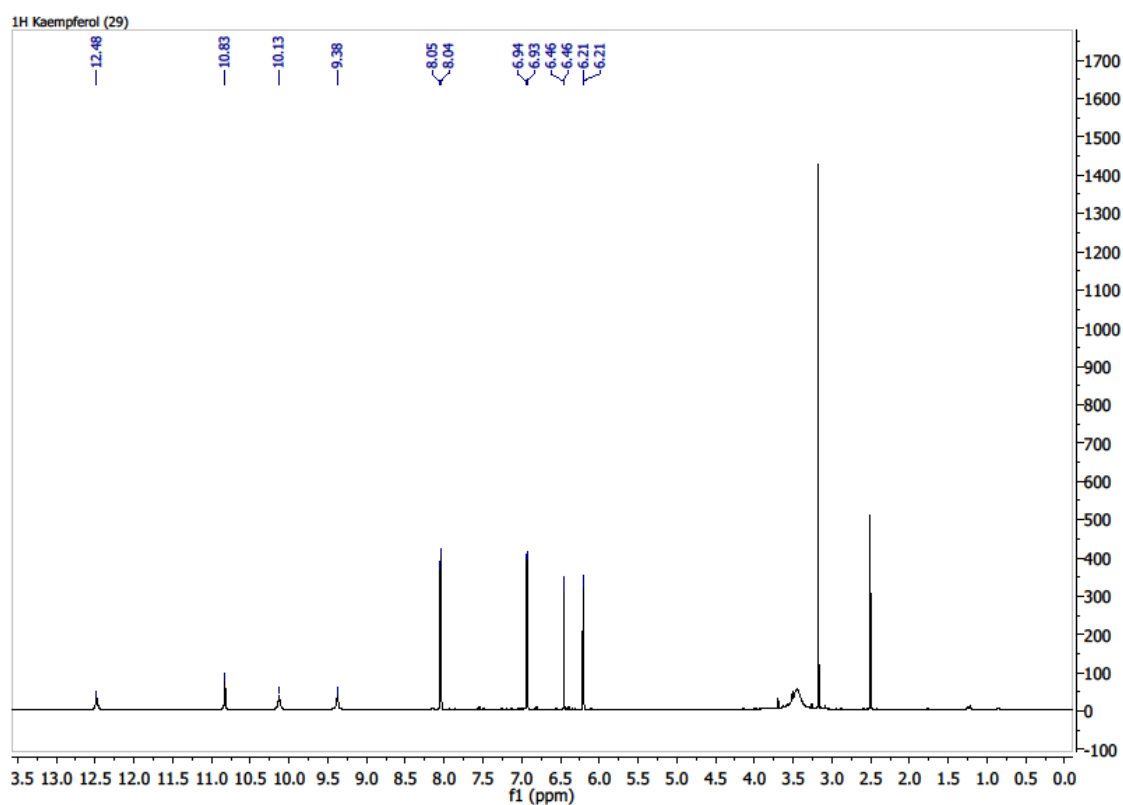

217

218

**Figure S39.** <sup>1</sup>H NMR spectrum (DMSO-*d*<sub>6</sub>) of kaempferol (29).

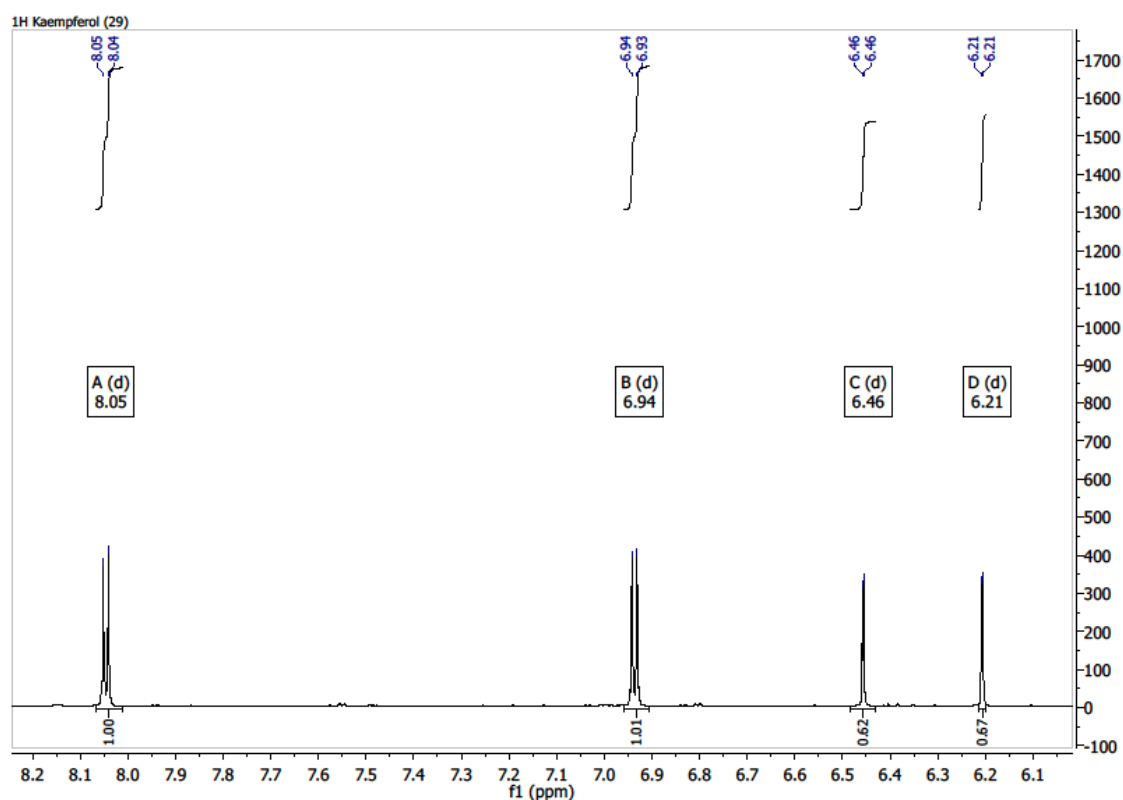

Figure S40. Zoom from 6.1 to 8.2 ppm, <sup>1</sup>H NMR spectrum (DMSO-*d*<sub>6</sub>) of kaempferol (29).

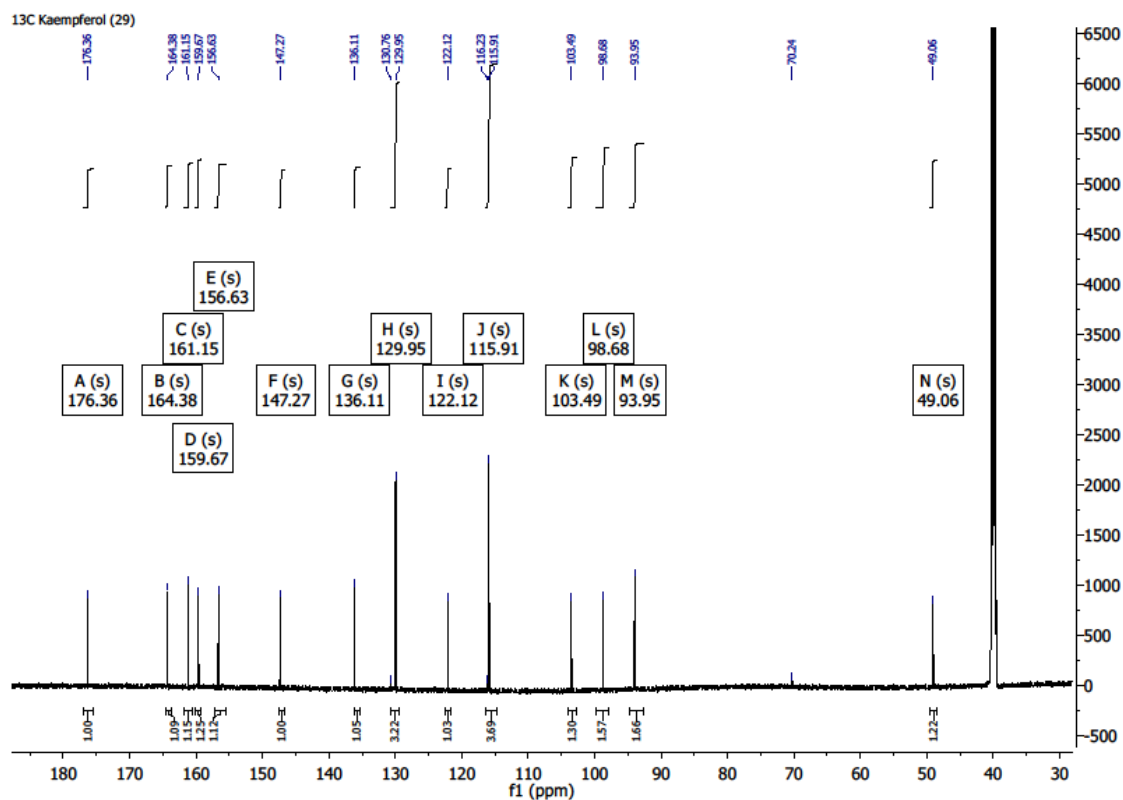

Figure S41. <sup>13</sup>C NMR spectrum (DMSO-*d*<sub>6</sub>) of kaempferol (29).

**Table S1.** NMR data of  $^1\text{H}$ ,  $^{13}\text{C}$  and HMBC for kaempferol 3-*O*-(6''-*O*-galloyl)- $\beta$ -D-glucopyranoside and kaempferol 3-*O*-(2''-*O*-galloyl)- $\beta$ -D-glucopyranoside (**13**, **16** or **19**).

| Kaempferol 3- <i>O</i> -(6''- <i>O</i> -galloyl)- $\beta$ -D-glucopyranoside |                                                               |                   |                                                         | Kaempferol 3- <i>O</i> -(2''- <i>O</i> -galloyl)- $\beta$ -D-glucopyranoside |                   |                                                      |
|------------------------------------------------------------------------------|---------------------------------------------------------------|-------------------|---------------------------------------------------------|------------------------------------------------------------------------------|-------------------|------------------------------------------------------|
| Carbon number                                                                | $^1\text{H}$                                                  | $^{13}\text{C}^*$ | HMBC                                                    | $^1\text{H}$                                                                 | $^{13}\text{C}^*$ | HMBC                                                 |
| 2                                                                            | -                                                             | 157.15            | -                                                       | -                                                                            | 155.46            | -                                                    |
| 3                                                                            | -                                                             | 133.52            | -                                                       | -                                                                            | 133.22            | -                                                    |
| 4                                                                            | -                                                             | -                 | -                                                       | -                                                                            | -                 | -                                                    |
| 5                                                                            | -                                                             | 161.90            | -                                                       | -                                                                            | 160.00            | -                                                    |
| 6                                                                            | 6.21 d ( $J=2.0$ Hz)                                          | 99.58             | C8, C10, C7, C5                                         | 6.21 d ( $J=2.0$ Hz)                                                         | 98.02             | C8, C10, C7, C5                                      |
| 7                                                                            | -                                                             | 164.50            | -                                                       | -                                                                            | 163.30            | -                                                    |
| 8                                                                            | 6.45 d ( $J=2.0$ Hz)                                          | 94.91             | C10, C9, C7, C6                                         | 6.45 d ( $J=2.0$ Hz)                                                         | 93.05             | C10, C6, C7, C9                                      |
| 9                                                                            | -                                                             | 157.26            | -                                                       | -                                                                            | 155.50            | -                                                    |
| 10                                                                           | -                                                             | 104.66            | -                                                       | -                                                                            | 102.70            | -                                                    |
| 1'                                                                           | -                                                             | 121.04            | -                                                       | -                                                                            | 120.90            | -                                                    |
| 2',6'                                                                        | 7.94 d ( $J=8.8$ Hz)                                          | 131.19            | C2, C4', C6' or 2'                                      | 8.04 d ( $J=8.8$ Hz)                                                         | 129.54            | C2' or 6', C4', C2, C3''' or 5'''                    |
| 3',5'                                                                        | 6.77 d ( $J=8.8$ Hz)                                          | 116.46            | C4', C1', C5' or 3'                                     | 6.89/6.93 d ( $J=8.8$ Hz)                                                    | 114.66            | C3''' or 5''', C4', C1'                              |
| 4'                                                                           | -                                                             | 150.58            | -                                                       | -                                                                            | 158.40            | -                                                    |
| 1''                                                                          | 5.45 d ( $J=7.6$ Hz)                                          | 102.17            | C3                                                      | 5.47 d ( $J=7.6$ Hz)                                                         | 100.38            | C3                                                   |
| 2''                                                                          | 3.24 - 3.50*                                                  | 74.52             | C1'', C3''                                              | 3.09 - 3.22*                                                                 | 73.68             | C1, C3                                               |
| 3''                                                                          |                                                               | 76.51             | C2'', C4''                                              |                                                                              | 75.87             | C2, C4                                               |
| 4''                                                                          |                                                               | 69.89             | C2'', C6''                                              |                                                                              | 69.48             | C5                                                   |
| 5''                                                                          |                                                               | 74.60             | -                                                       |                                                                              | 76.74             | C3, C4                                               |
| 6''                                                                          | 4.17 dd ( $J=12$ and 3.8 Hz),<br>4.26 dd ( $J=12$ and 2.0 Hz) | 63.15             | C5'', C4'', C7'''                                       | 3.62 and 3.38*                                                               | 60.68             | C5, C4                                               |
| 1'''                                                                         | -                                                             | 120.00            | -                                                       | -                                                                            | 124.00            | -                                                    |
| 2''',6'''                                                                    | 6.92 s                                                        | 109.70            | C7''', C2''' or 6''',<br>C3''' or 5''', C4''',<br>C1''' | 6.90 s                                                                       | 108.45            | C7''', C4''', C3''' or 5''', C1''',<br>C2''' or 6''' |
| 3''',5'''                                                                    | -                                                             | 146.11            | -                                                       | -                                                                            | 145.96            | -                                                    |
| 4'''                                                                         | -                                                             | 138.94            | -                                                       | -                                                                            | 138.86            | -                                                    |
| 7'''                                                                         | -                                                             | 165.36            | -                                                       | -                                                                            | 162.11            | -                                                    |
| OH-C5                                                                        | 12.52 s                                                       | -                 | -                                                       |                                                                              |                   |                                                      |
| OH-C7                                                                        | 10.87 s                                                       | -                 | -                                                       |                                                                              |                   |                                                      |
| OH-C4'                                                                       | 10.06 s                                                       | -                 | -                                                       |                                                                              |                   |                                                      |

\*Chemical shifts of  $^{13}\text{C}$  NMR were obtained by correlations in HSQC and HMBC.

228 **Table S2.** NMR data of  $^1\text{H}$ ,  $^{13}\text{C}$  and HMBC for kaempferol 3-O-glucuronide-6''-O-methylester (**23**).

| Carbon number | $^1\text{H}$         | $^{13}\text{C}^*$ | HMBC                |
|---------------|----------------------|-------------------|---------------------|
| 2             | -                    | 157.17            | -                   |
| 3             | -                    | 133.58            | -                   |
| 4             | -                    | -                 | -                   |
| 5             | -                    | 161.58            | -                   |
| 6             | 6.23 d ( $J=2.0$ Hz) | 99.53             | C8, C10, C7         |
| 7             | -                    | 164.78            | -                   |
| 8             | 6.45 d ( $J=2.0$ Hz) | 94.10             | C6, C10, C7, C9     |
| 9             | -                    | 156.94            | -                   |
| 10            | -                    | 104.46            | -                   |
| 1'            | -                    | 121.05            | -                   |
| 2',6'         | 8.02 d ( $J=8.9$ Hz) | 131.73            | C3, C2' or 6', C4'  |
| 3',5'         | 6.89 d ( $J=8.9$ Hz) | 115.50            | C1', C3' or 5', C4' |
| 4'            | -                    | 160.62            | -                   |
| 1''           | 5.47 d ( $J=7.7$ Hz) | 101.74            | C3                  |
| 2''           | 3.24-3.36*           | 74.60             | C1'', C3'',         |
| 3''           |                      | 75.92             | C2'', C4''          |
| 4''           |                      | 71.95             | C5'', C6''          |
| 5''           | 3.73 d ( $J=9.7$ Hz) | 76.13             | C1'', C6'', C4''    |
| 6''           | -                    | 169.52            | -                   |
| MeO-C6''      | 3.57 s               | 52.32             | C6''                |
| OH-C5         | 12.51 s              | -                 | -                   |
| OH-C7         | 10.97 s              | -                 | -                   |
| OH-C4'        | 10.22 s              | -                 | -                   |

\*Chemical shifts of  $^{13}\text{C}$  NMR were obtained by correlations in HSQC and HMBC.

229

230



**Table S3.** NMR data of  $^1\text{H}$ ,  $^{13}\text{C}$  and HMBC for quercetin 3-*O*-(6''-*O*-*p*-coumaroyl)- $\beta$ -D-glucopyranoside (**25**) and kaempferol 3-*O*-(6''-*O*-*p*-coumaroyl)- $\beta$ -D-glucopyranoside (**27**).

| Quercetin<br>3- <i>O</i> -(6''- <i>O</i> - <i>p</i> -coumaroyl)- $\beta$ -D-glucopyranoside |                                  |                   | Kaempferol 3- <i>O</i> -(6''- <i>O</i> - <i>p</i> -coumaroyl)- $\beta$ -D-glucopyranoside |                   |                                |
|---------------------------------------------------------------------------------------------|----------------------------------|-------------------|-------------------------------------------------------------------------------------------|-------------------|--------------------------------|
| Carbon number                                                                               | $^1\text{H}$                     | $^{13}\text{C}^*$ | $^1\text{H}$                                                                              | $^{13}\text{C}^*$ | HMBC                           |
| 2                                                                                           | -                                | -                 | -                                                                                         | 156.96            | -                              |
| 3                                                                                           | -                                | -                 | -                                                                                         | -                 | -                              |
| 4                                                                                           | -                                | -                 | -                                                                                         | -                 | -                              |
| 5                                                                                           | -                                | -                 | -                                                                                         | 161.69            | -                              |
| 6                                                                                           | 6.14 d ( $J=2.1$ Hz)             | 99.19             | 6.14 d ( $J=2.1$ Hz)                                                                      | 99.30             | C8, C10, C5                    |
| 7                                                                                           | -                                | -                 | -                                                                                         | 164.56            | -                              |
| 8                                                                                           | 6.38 d ( $J=2.1$ Hz)             | 93.90             | 6.40 d ( $J=2.1$ Hz)                                                                      | 94.19             | C10, C9, C7, C6                |
| 9                                                                                           | -                                | -                 | -                                                                                         | 156.55            | -                              |
| 10                                                                                          | -                                | -                 | -                                                                                         | 104.20            | -                              |
| 1'                                                                                          | -                                | -                 | -                                                                                         | 125.58            | -                              |
| 2'                                                                                          | 7.52 d ( $J=2.3$ Hz)             | 116.42            | 8.05 d ( $J=8.4$ Hz)                                                                      | 131.47            | C2, C4', C6'or 2'              |
| 3'                                                                                          | -                                | -                 | 6.78 d ( $J=8.4$ Hz)                                                                      | 116.35            | C1', C5' or 3'                 |
| 4'                                                                                          | -                                | -                 | -                                                                                         | 160.38            | -                              |
| 5'                                                                                          | 6.78 d ( $J=8.4$ Hz)             | 116.01            | 6.78 d ( $J=8.4$ Hz)                                                                      | 116.35            |                                |
| 6'                                                                                          | 7.66 dd ( $J=8.4$ Hz and 2.3 Hz) | 122.38            | 8.05 d ( $J=8.4$ Hz)                                                                      | 131.47            |                                |
| 1''                                                                                         | 5.42 d ( $J=7.8$ Hz)             | 102.03            | 5.41 d ( $J=7.7$ Hz)                                                                      | 102.04            | -                              |
| 2''                                                                                         | -                                | -                 | 3.51 - 3.70                                                                               | 71.47             | C1                             |
| 3''                                                                                         | -                                | -                 |                                                                                           | 70.32             | -                              |
| 4''                                                                                         | -                                | -                 |                                                                                           | 73.40             | C5''ou C3'', C1'', C6''or C2'' |
| 5''                                                                                         | -                                | -                 |                                                                                           | 69.05             | -                              |
| 6''                                                                                         | 4.12 dd ( $J=11.5$ Hz and 4.6Hz) | 63.62             | 4.10 d ( $J=6.2$ Hz)                                                                      | 63.71             | C9'', C4'', C5''or C3''        |
| 1'''                                                                                        | -                                | -                 | -                                                                                         | 121.33 or 125.05  | -                              |
| 2''',6'''                                                                                   | 7.37 d ( $J=8.4$ Hz)             | 130.62            | 7.35 d ( $J=8.7$ Hz)                                                                      | 130.66            | C7''', C4'''                   |
| 3''',5'''                                                                                   | 6.83 d ( $J=8.4$ Hz)             | 115.61            | 6.86 d ( $J=8.7$ Hz)                                                                      | 115.52            | C1''', C5''or C3'', C4'''      |
| 4'''                                                                                        | -                                | -                 | -                                                                                         | 160.53            | -                              |
| 7'''                                                                                        | 7.36 d ( $J=15.7$ Hz)            | 145.31            | 7.34 d ( $J=15.9$ Hz)                                                                     | 145.24            | C9''', C2'''or C6'''           |
| 8'''                                                                                        | 6.13 d ( $J=15.7$ Hz)            | 114.10            | 6.11 d ( $J=15.9$ Hz)                                                                     | 114.29            | -                              |
| 9'''                                                                                        | -                                | -                 | -                                                                                         | 166.85            | -                              |
| OH-C5                                                                                       | 12.64 s                          | -                 | 12.59 s                                                                                   | -                 | -                              |
| OH-C7                                                                                       | 10.84 s                          | -                 | 10.87 s                                                                                   | -                 | C7, C6, C8                     |
| OH-C3'                                                                                      | 9.16 s                           | -                 |                                                                                           | -                 | -                              |
| OH-C4'                                                                                      | 9.73 s                           | -                 | 10.03 s                                                                                   | -                 | -                              |
| OH-C4'''                                                                                    | 10.01 s                          | -                 | 10.20 s                                                                                   | -                 | -                              |

\*Chemical shifts of  $^{13}\text{C}$  NMR were obtained by correlations in HSQC.

234 **Table S4.** NMR data of  $^1\text{H}$  and  $^{13}\text{C}$  for Kaempferol (**29**).

| Carbon number | $^1\text{H}$         | $^{13}\text{C}$ |
|---------------|----------------------|-----------------|
| 2             | -                    | 147.27          |
| 3             | -                    | 136.11          |
| 4             | -                    | 176.36          |
| 5             | -                    | 161.15          |
| 6             | 6.21 d ( $J=2.0$ Hz) | 96.68           |
| 7             | -                    | 164.38          |
| 8             | 6.46 d ( $J=2.0$ Hz) | 93.95           |
| 9             | -                    | 156.63          |
| 10            | -                    | 103.49          |
| 1'            | -                    | 122.12          |
| 2',6'         | 8.05 d ( $J=8.9$ Hz) | 129.95          |
| 4'            | -                    | 159.67          |
| 3',5'         | 6.94 d ( $J=8.9$ Hz) | 115.91          |
| OH-C3         | 9.38 s               |                 |
| OH-C5         | 12.48 s              | -               |
| OH-C7         | 10.83 s              | -               |
| OH-C4'        | 10.13 s              | -               |

235
